# Supplementary material for: Protein 3D Structure Computed from Evolutionary Sequence Variation
Source: PubMed Central journal article supplement (PMC3233603; doi:10.1371/journal.pone.0028766), 2011-12-07

# Figure S3. Ribbon representations of top ranked predicted structures.

predicted  
blind top ranked

observed  
crystal structure

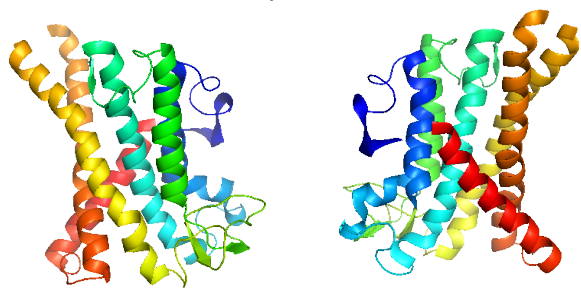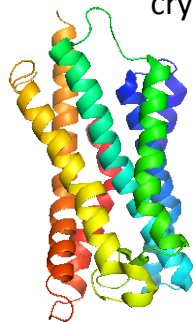

OPSD\_BOVIN

1HZX.pdb

180°

180°

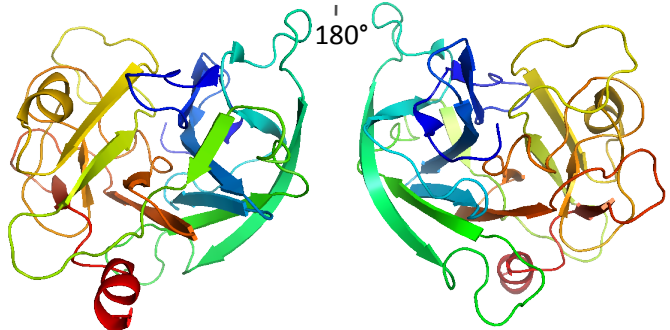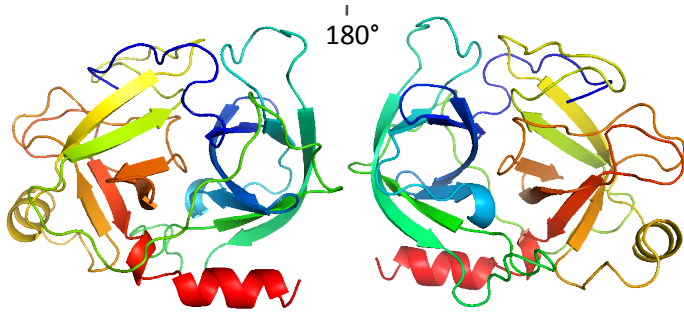

TRY2\_RAT

3TGI.pdb

180°

180°

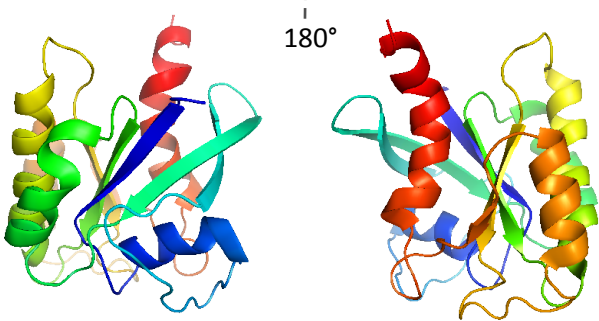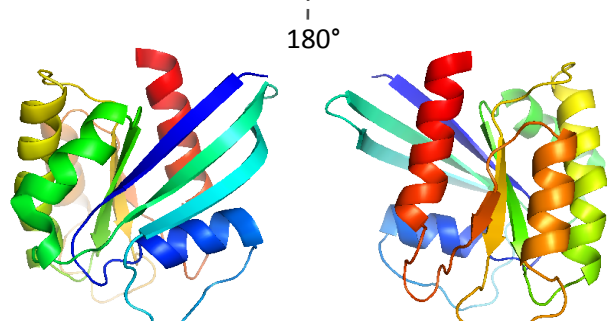

RASH\_HUMAN

5P21.pdb

180°

180°

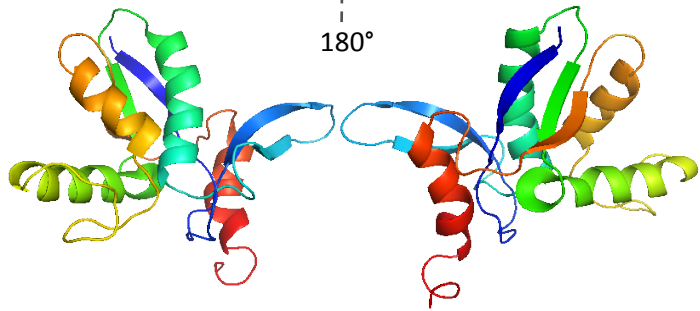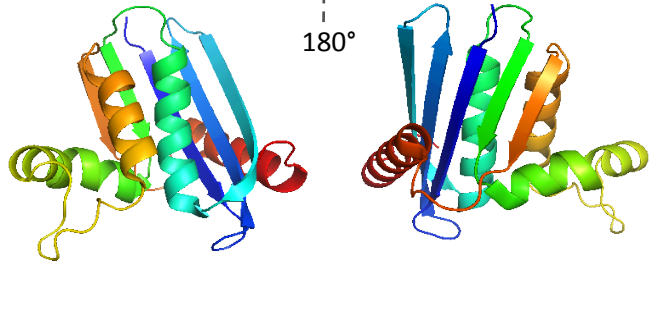

RNH\_ECOLI

1F21.pdb

# Figure S3. Ribbon representations of top ranked predicted structures.

predicted  
blind top ranked

observed  
crystal structure

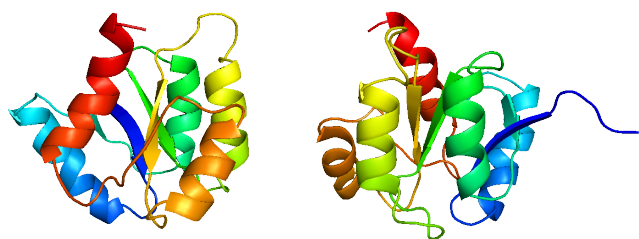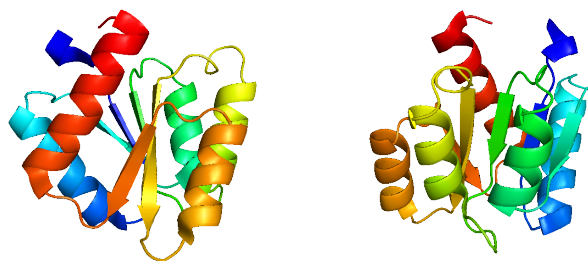

CHEY\_ECOLI

1E6K.pdb

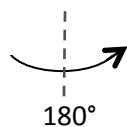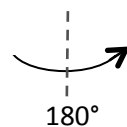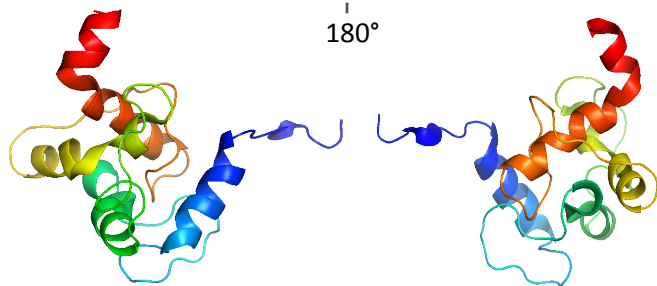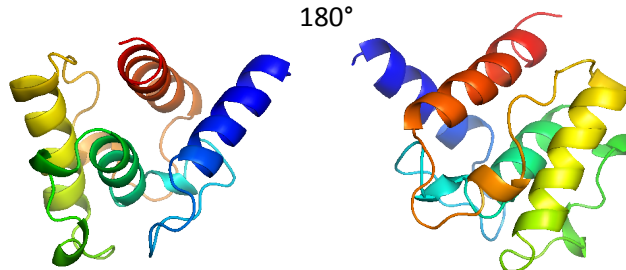

SPBT2\_HUMAN

1BKR.pdb

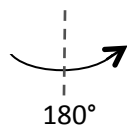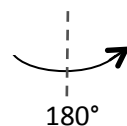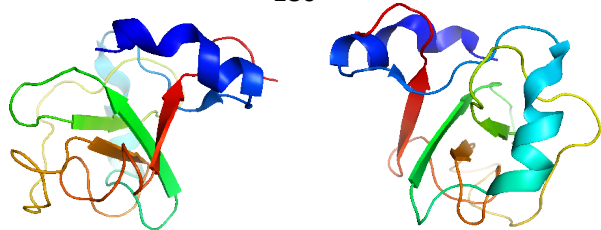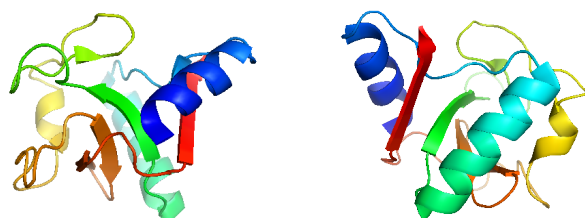

A8MVQ9\_HUMAN

2IT6.pdb

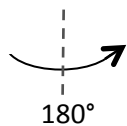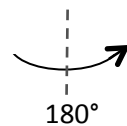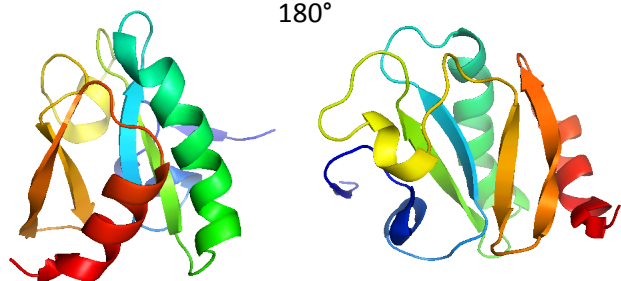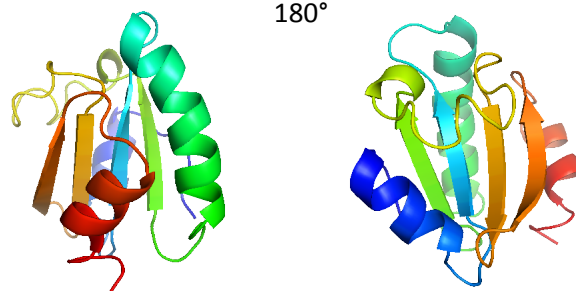

THIO\_ALIAC

5P21.pdb

# Figure S3. Ribbon representations of top ranked predicted structures.

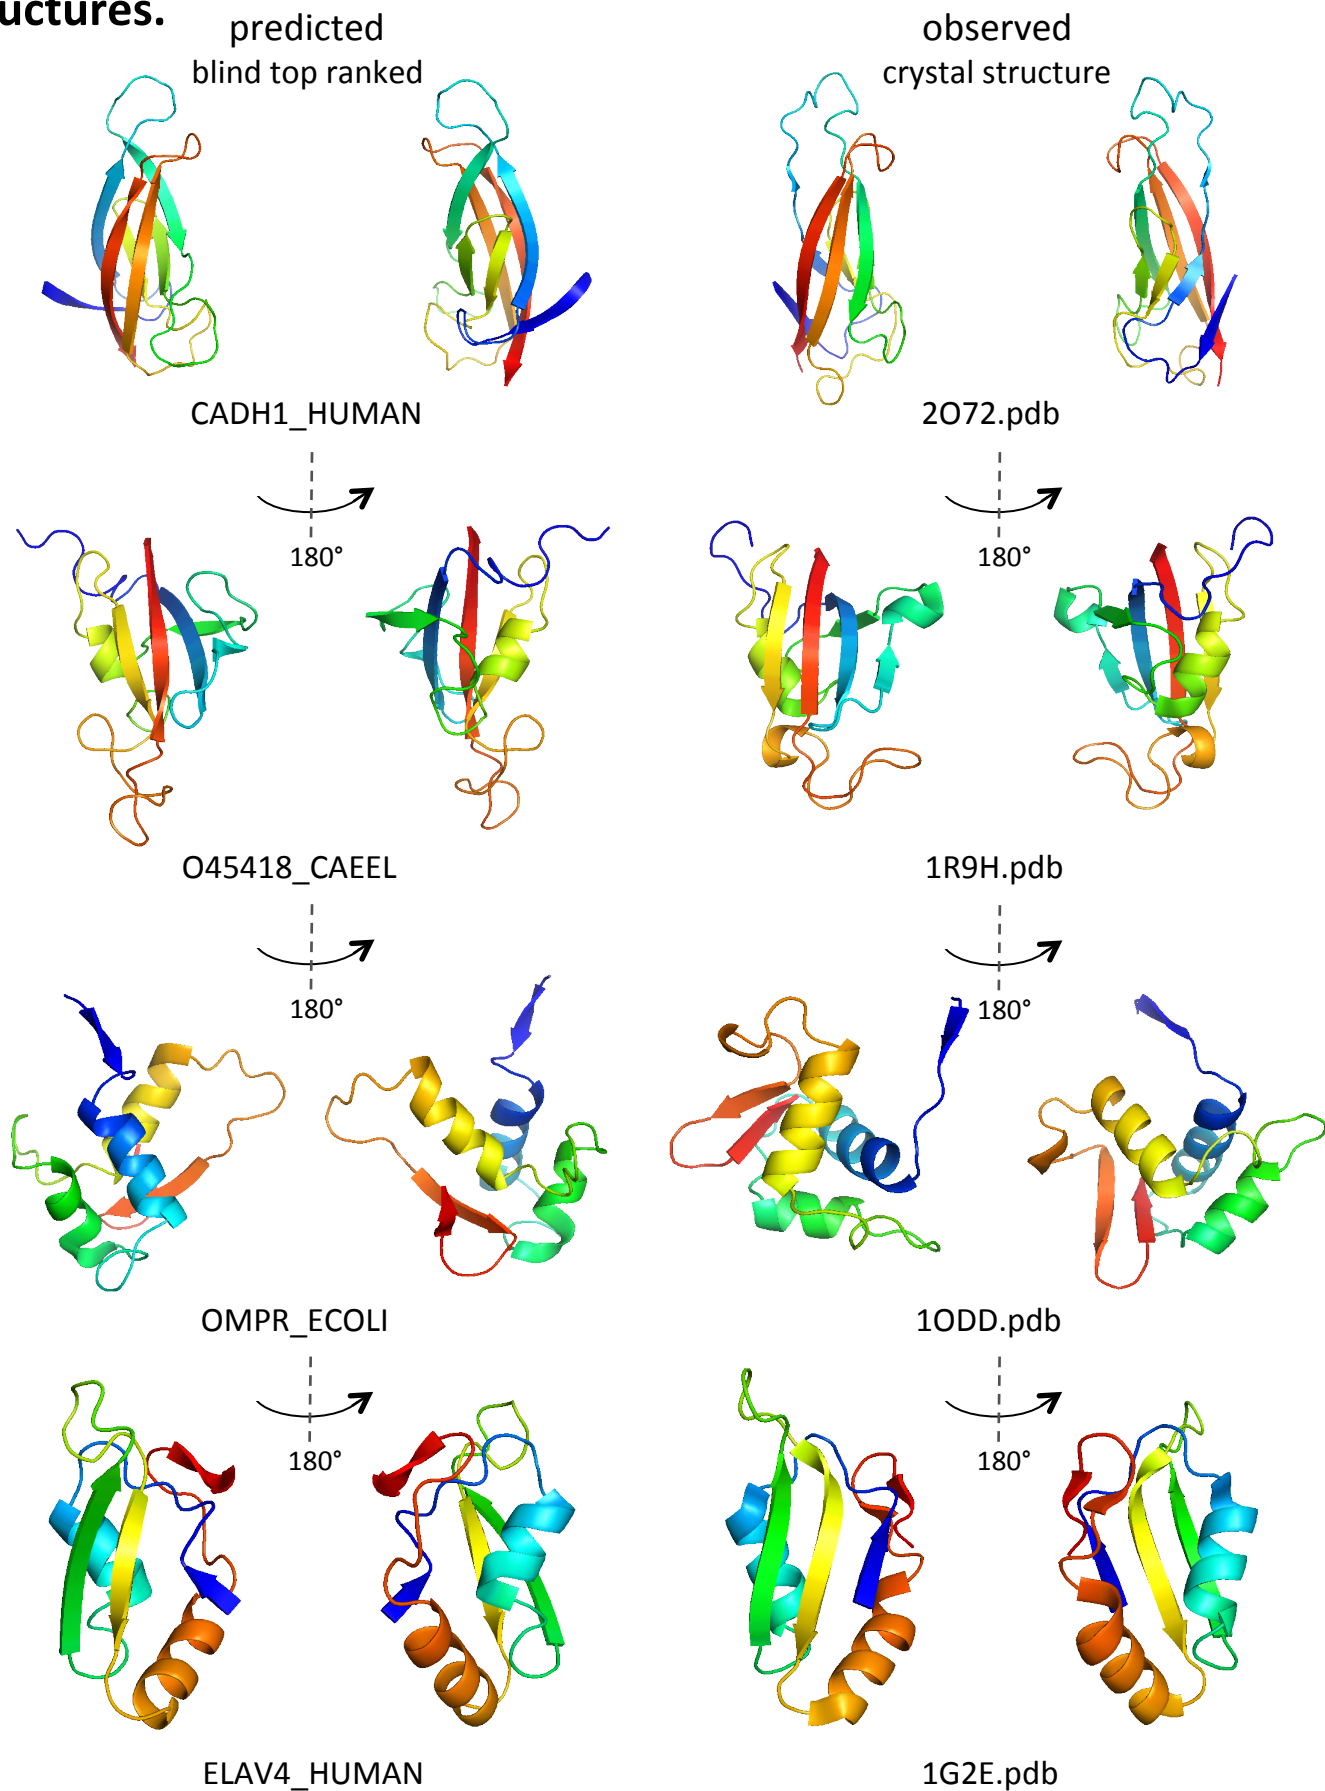

# Figure S3. Ribbon representations of top ranked predicted structures.

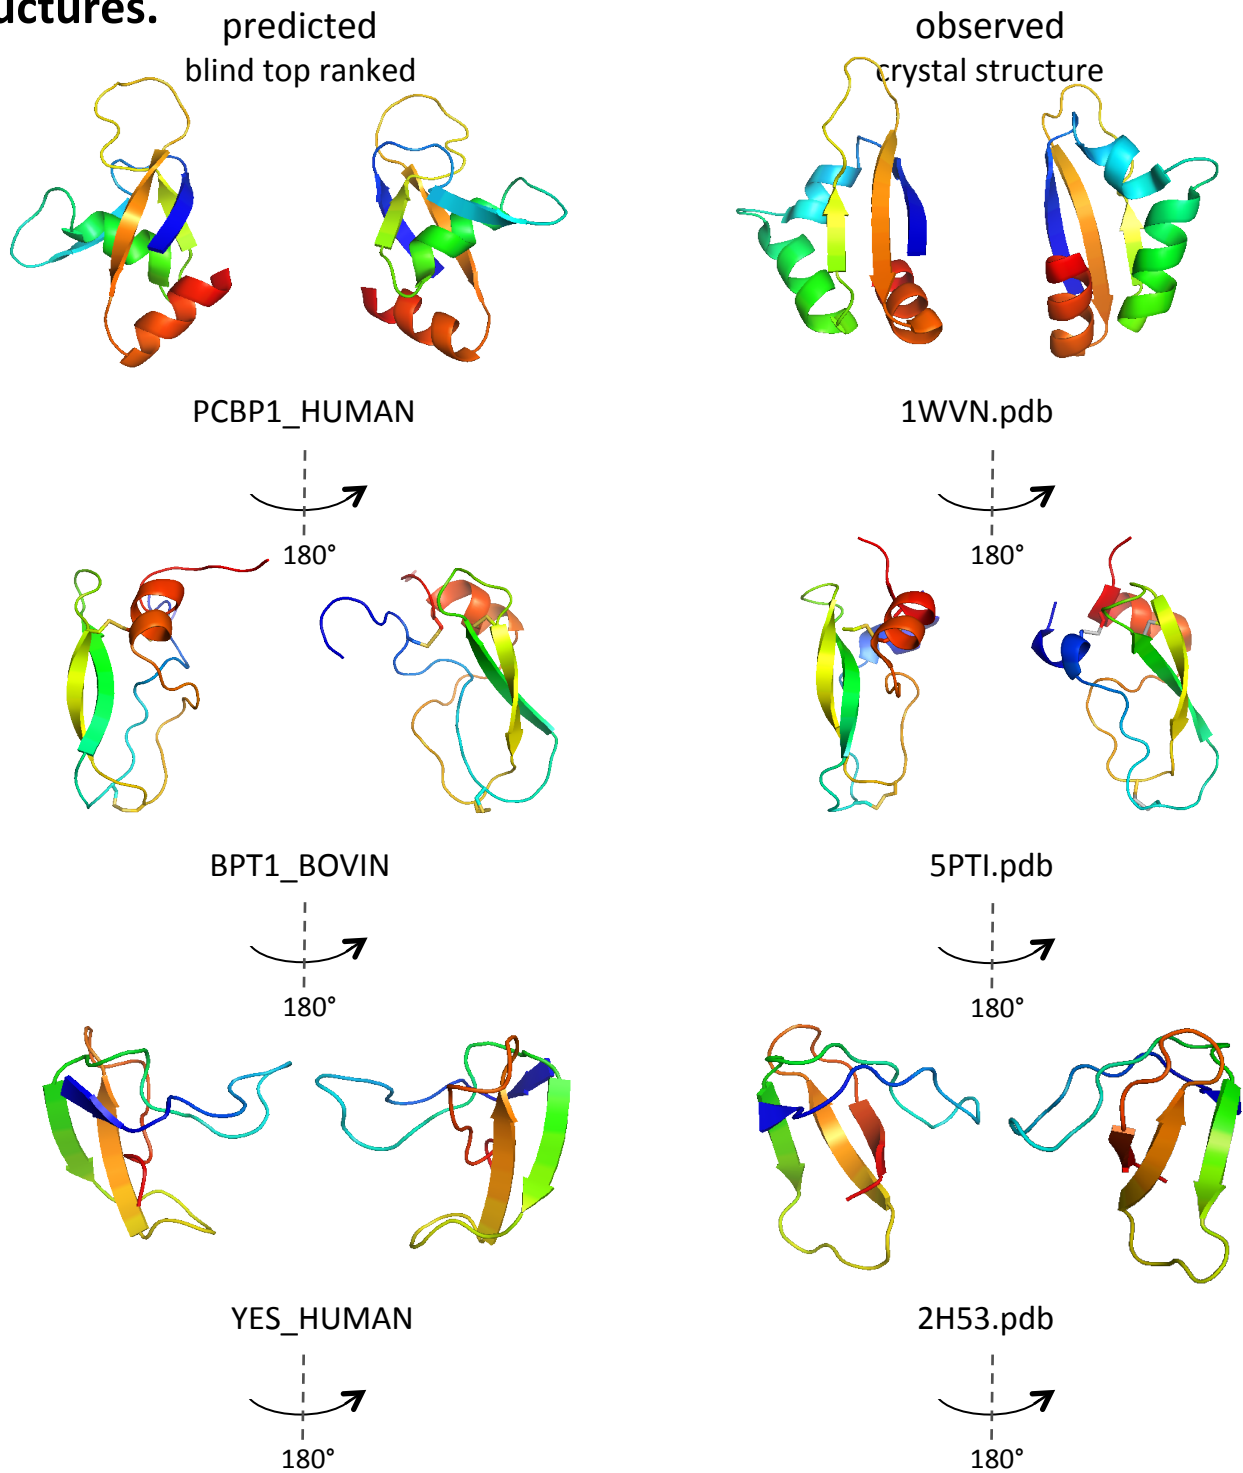

Supplement: pone.0028766.s003.pdf [file pone.0028766.s003.pdf]
