# Supplementary material for: Protein 3D Structure Computed from Evolutionary Sequence Variation
Source: PubMed Central journal article supplement (PMC3233603; doi:10.1371/journal.pone.0028766), 2011-12-07

**Figure S2. Evolutionary Inferred Contacts (EICs) (from Direct Information (DI)) contact maps.**

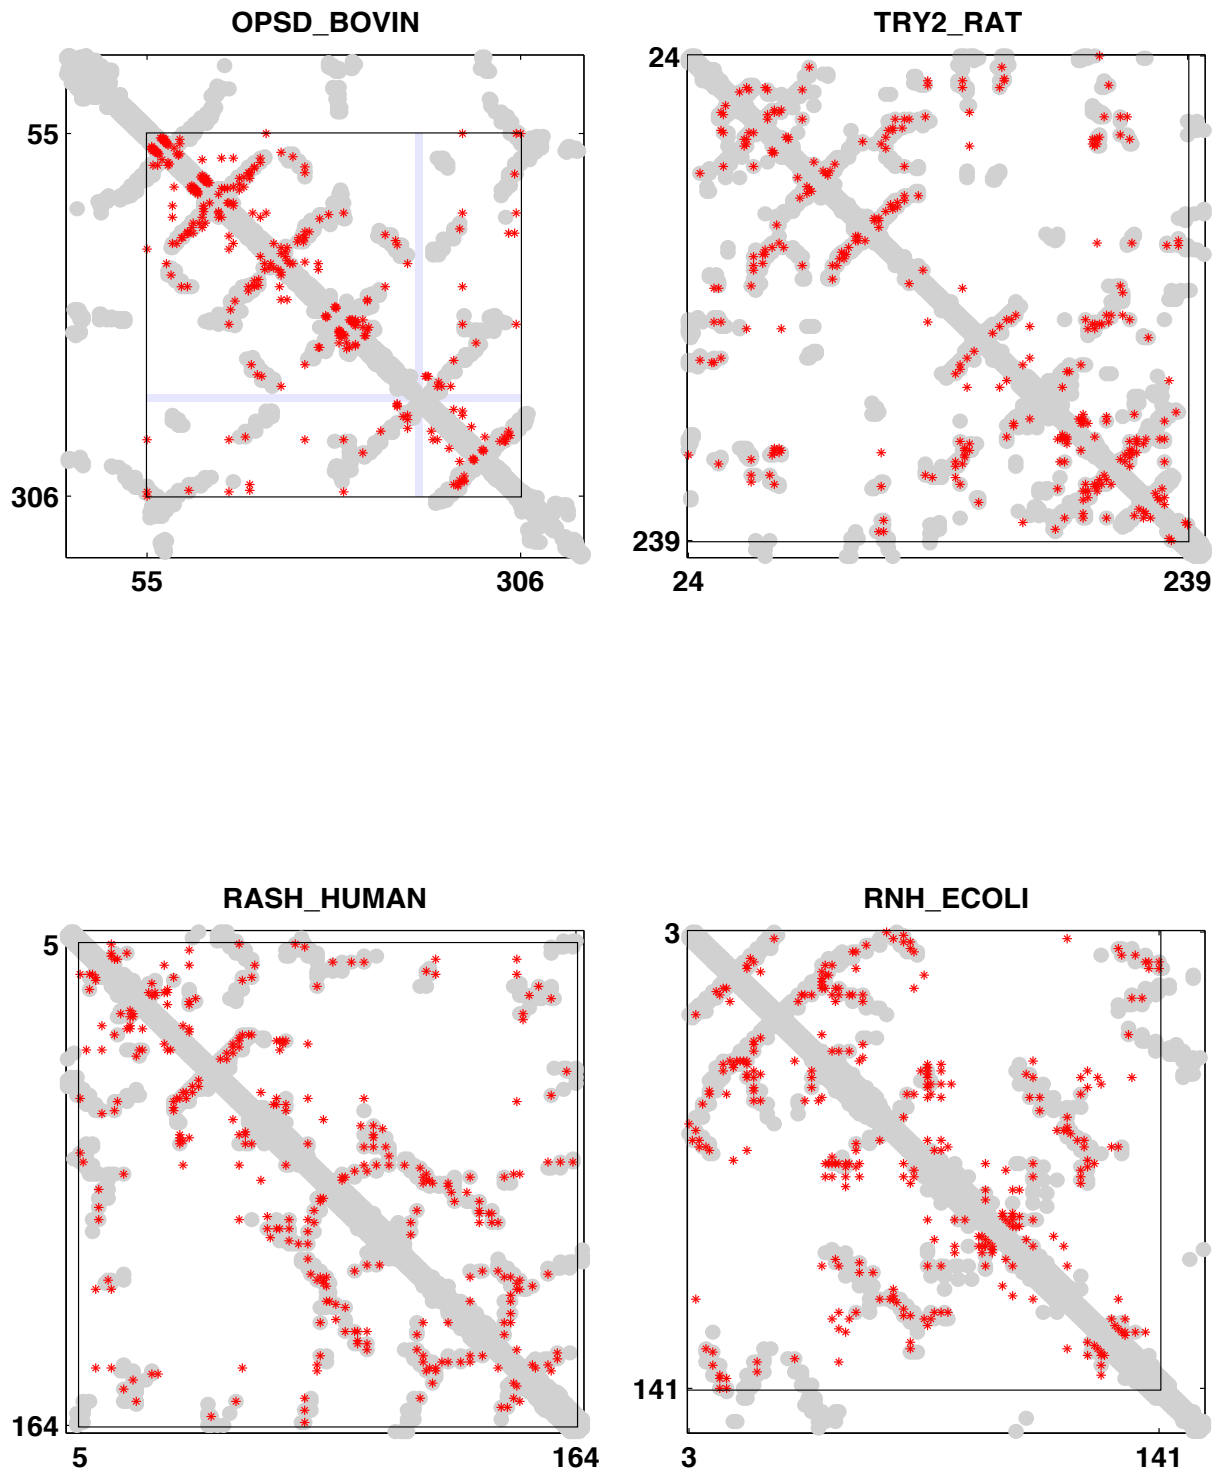

**Figure S2. Evolutionary Inferred Contacts (EICs) (from Direct Information (DI)) contact maps.**

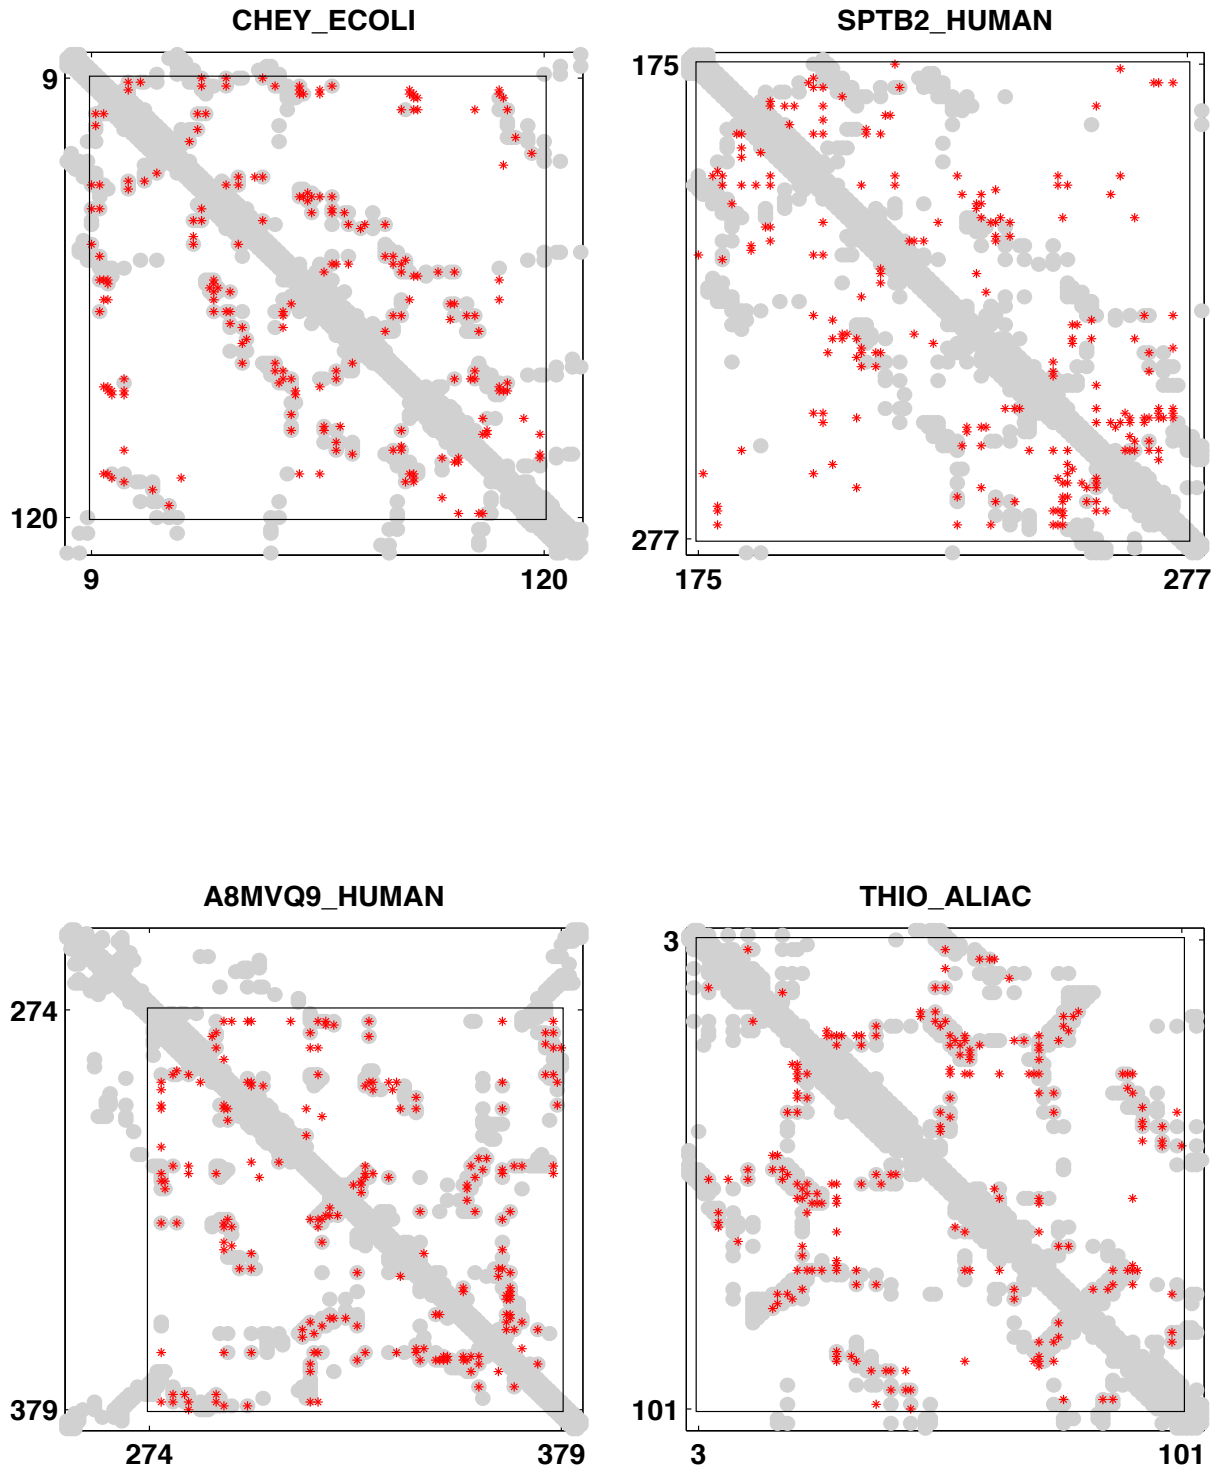

**Figure S2. Evolutionary Inferred Contacts (EICs) (from Direct Information (DI)) contact maps.**

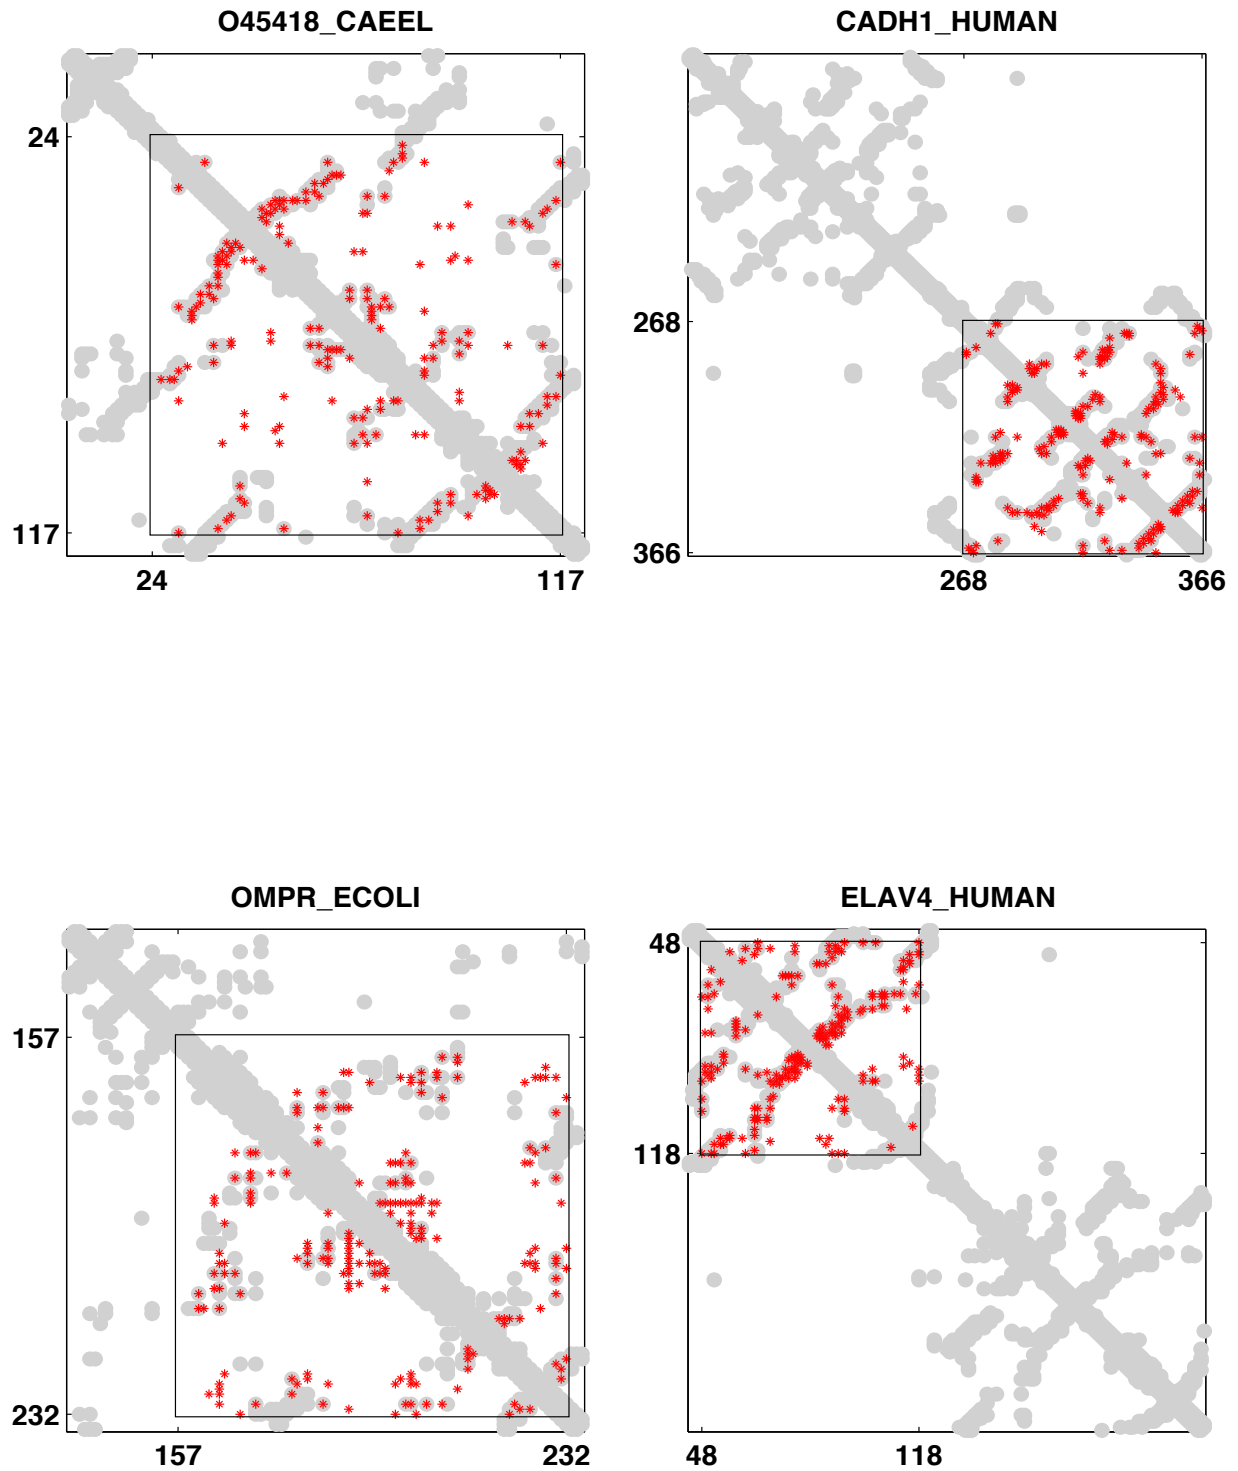

**Figure S2. Evolutionary Inferred Contacts (EICs) (from Direct Information (DI)) contact maps.**

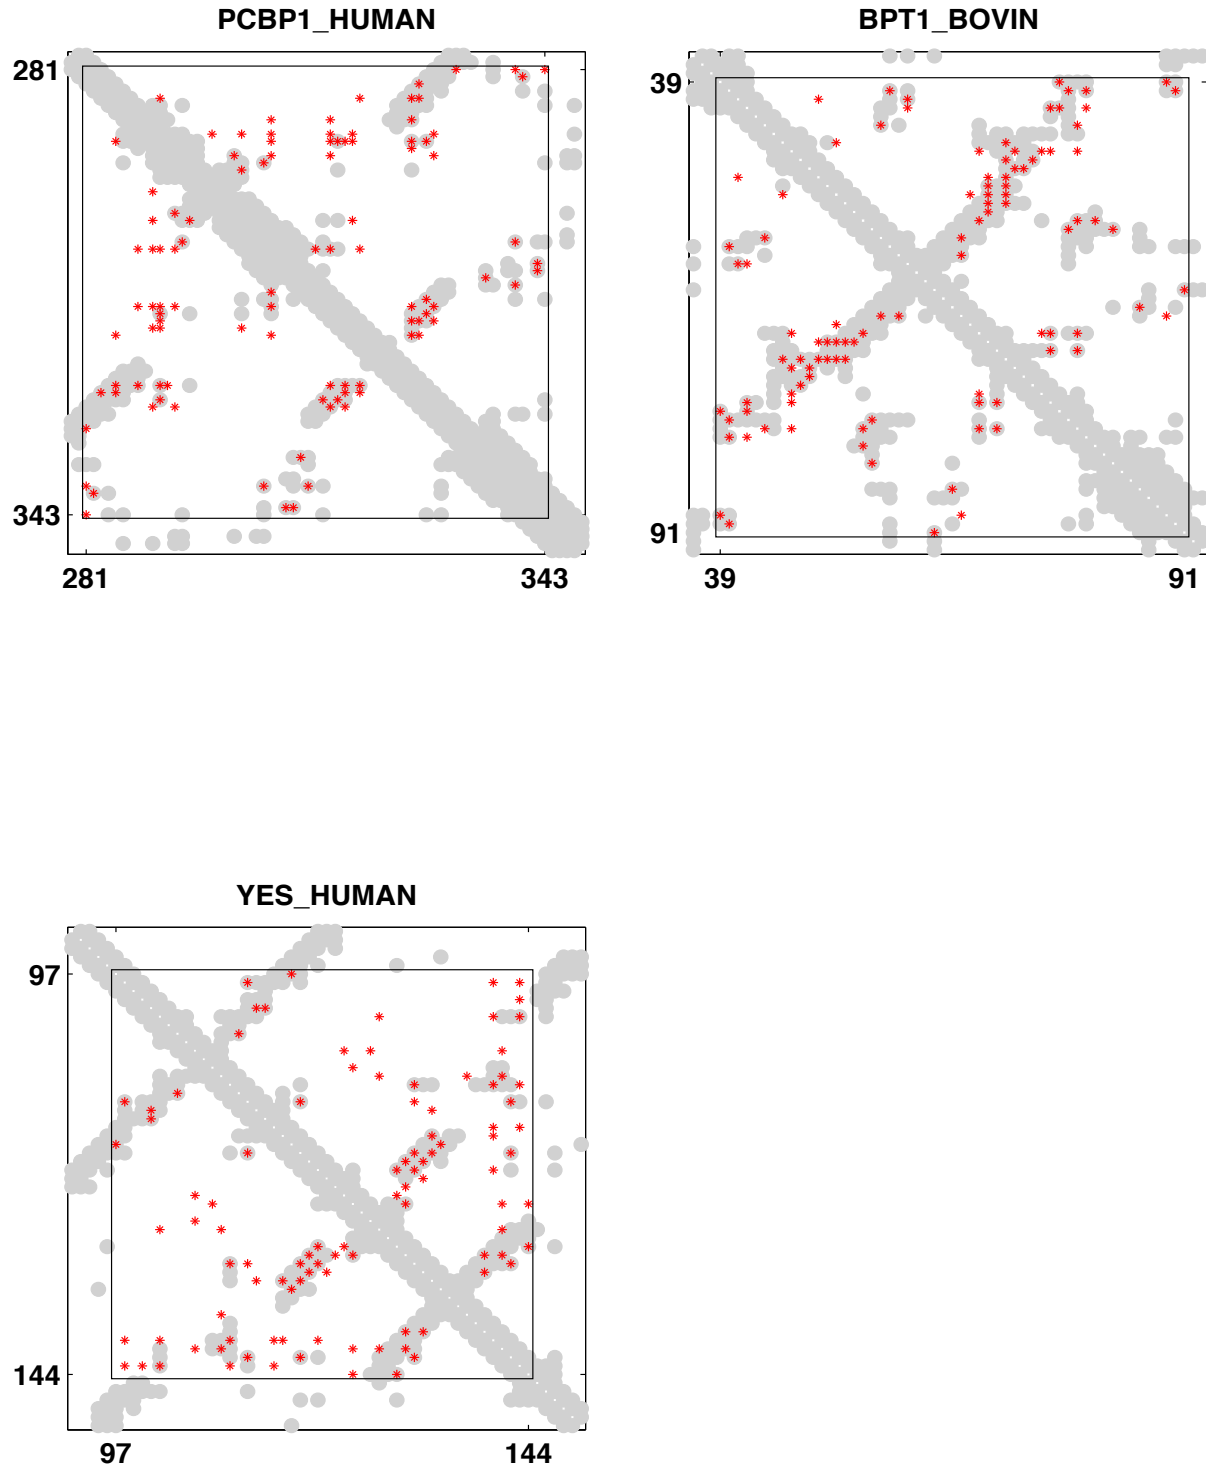

Supplement: pone.0028766.s002.pdf [file pone.0028766.s002.pdf]
