# Supplementary material for: Protein 3D Structure Computed from Evolutionary Sequence Variation
Source: PubMed Central journal article supplement (PMC3233603; doi:10.1371/journal.pone.0028766), 2011-12-07
Supplement: pone.0028766.s004.pdf [file pone.0028766.s004.pdf]

# Figure S4. Active sites of top-ranked predicted Trypsin and Ras structures

## A. Trypsin – 3 catalytic residues

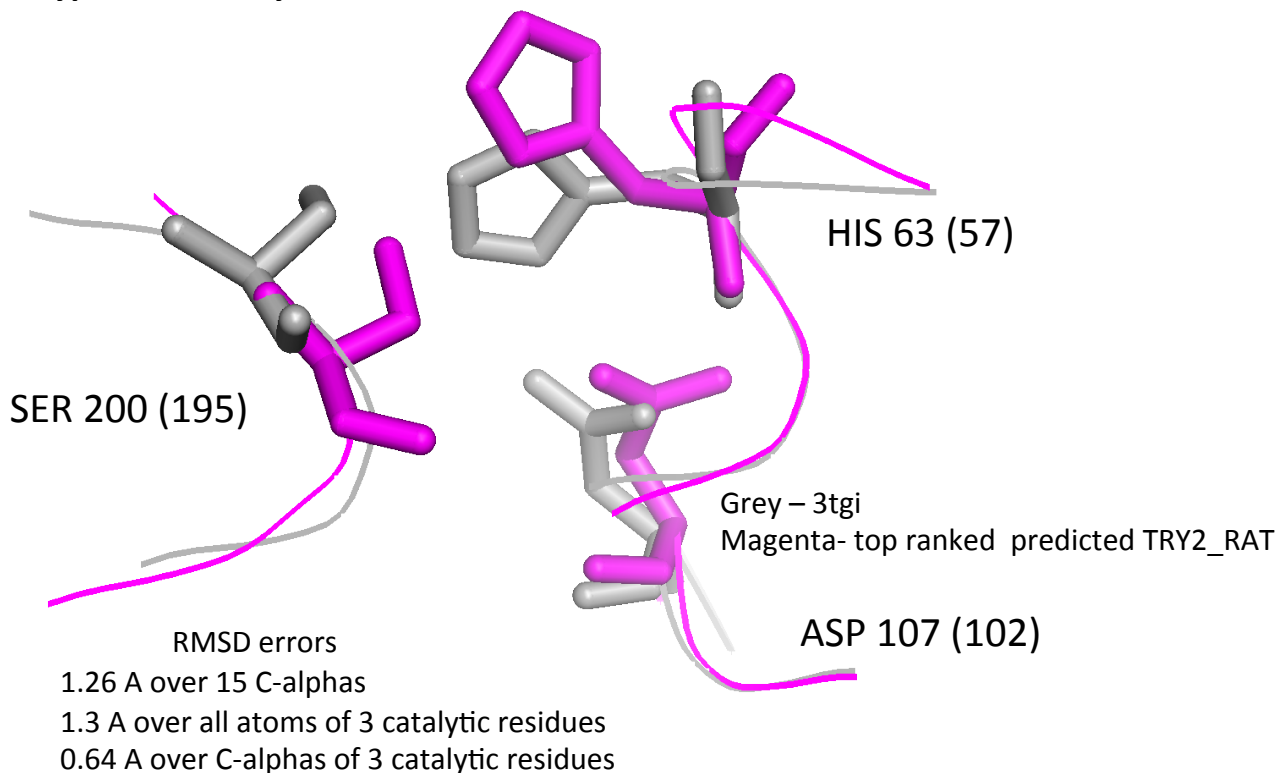

## B. RAS GDP binding site

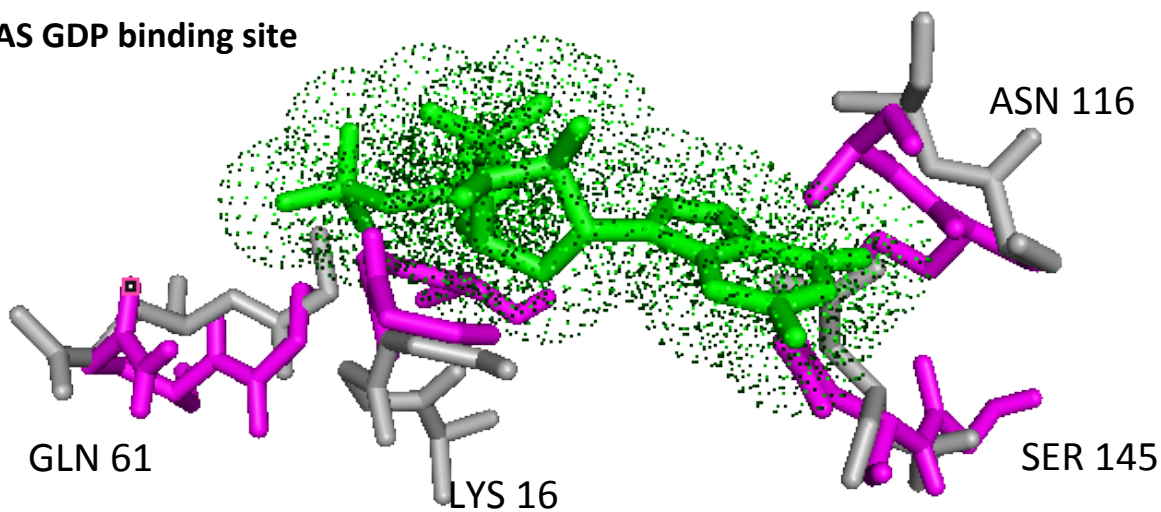

Grey: 5p21, green: bound GDP, magenta: top ranked predicted Ras structure
