# Supplementary material for: Protein 3D Structure Computed from Evolutionary Sequence Variation
Source: PubMed Central journal article supplement (PMC3233603; doi:10.1371/journal.pone.0028766), 2011-12-07

**Figure S5. Discrimination accuracy of predicted structures**

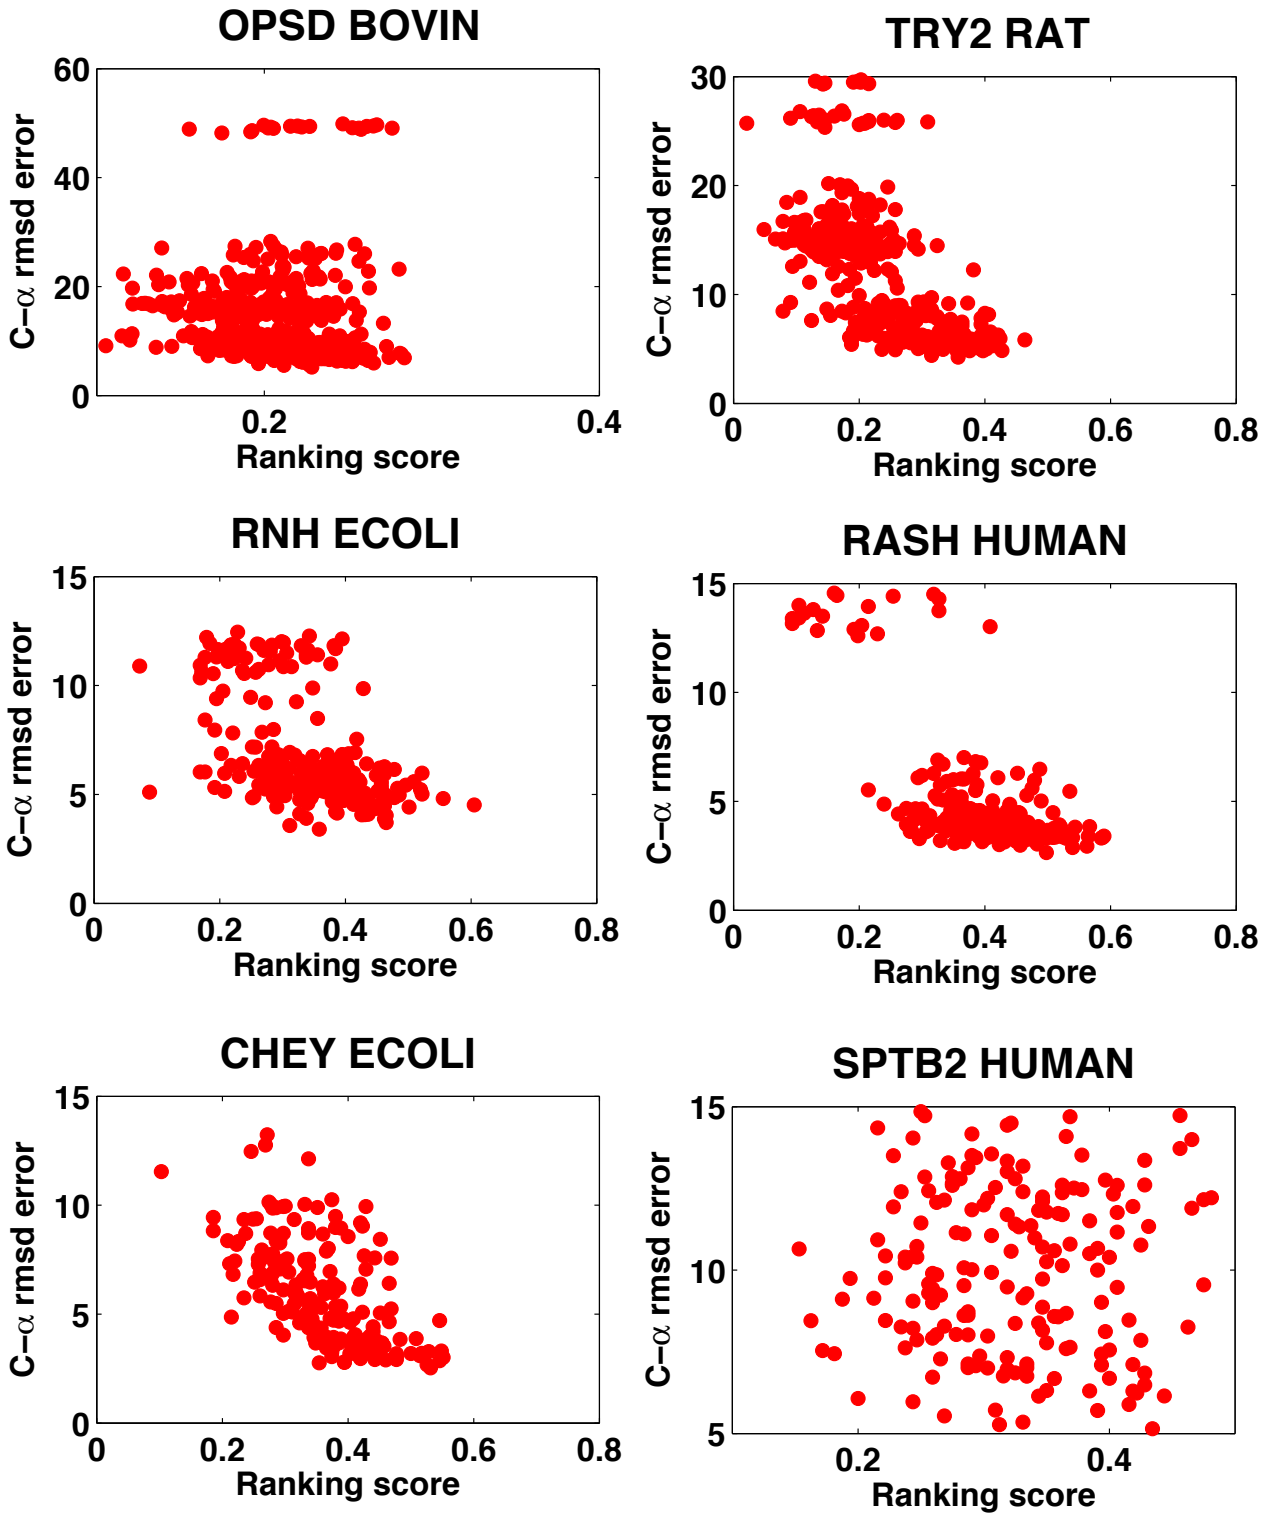

**Figure S5. Discrimination accuracy of predicted structures**

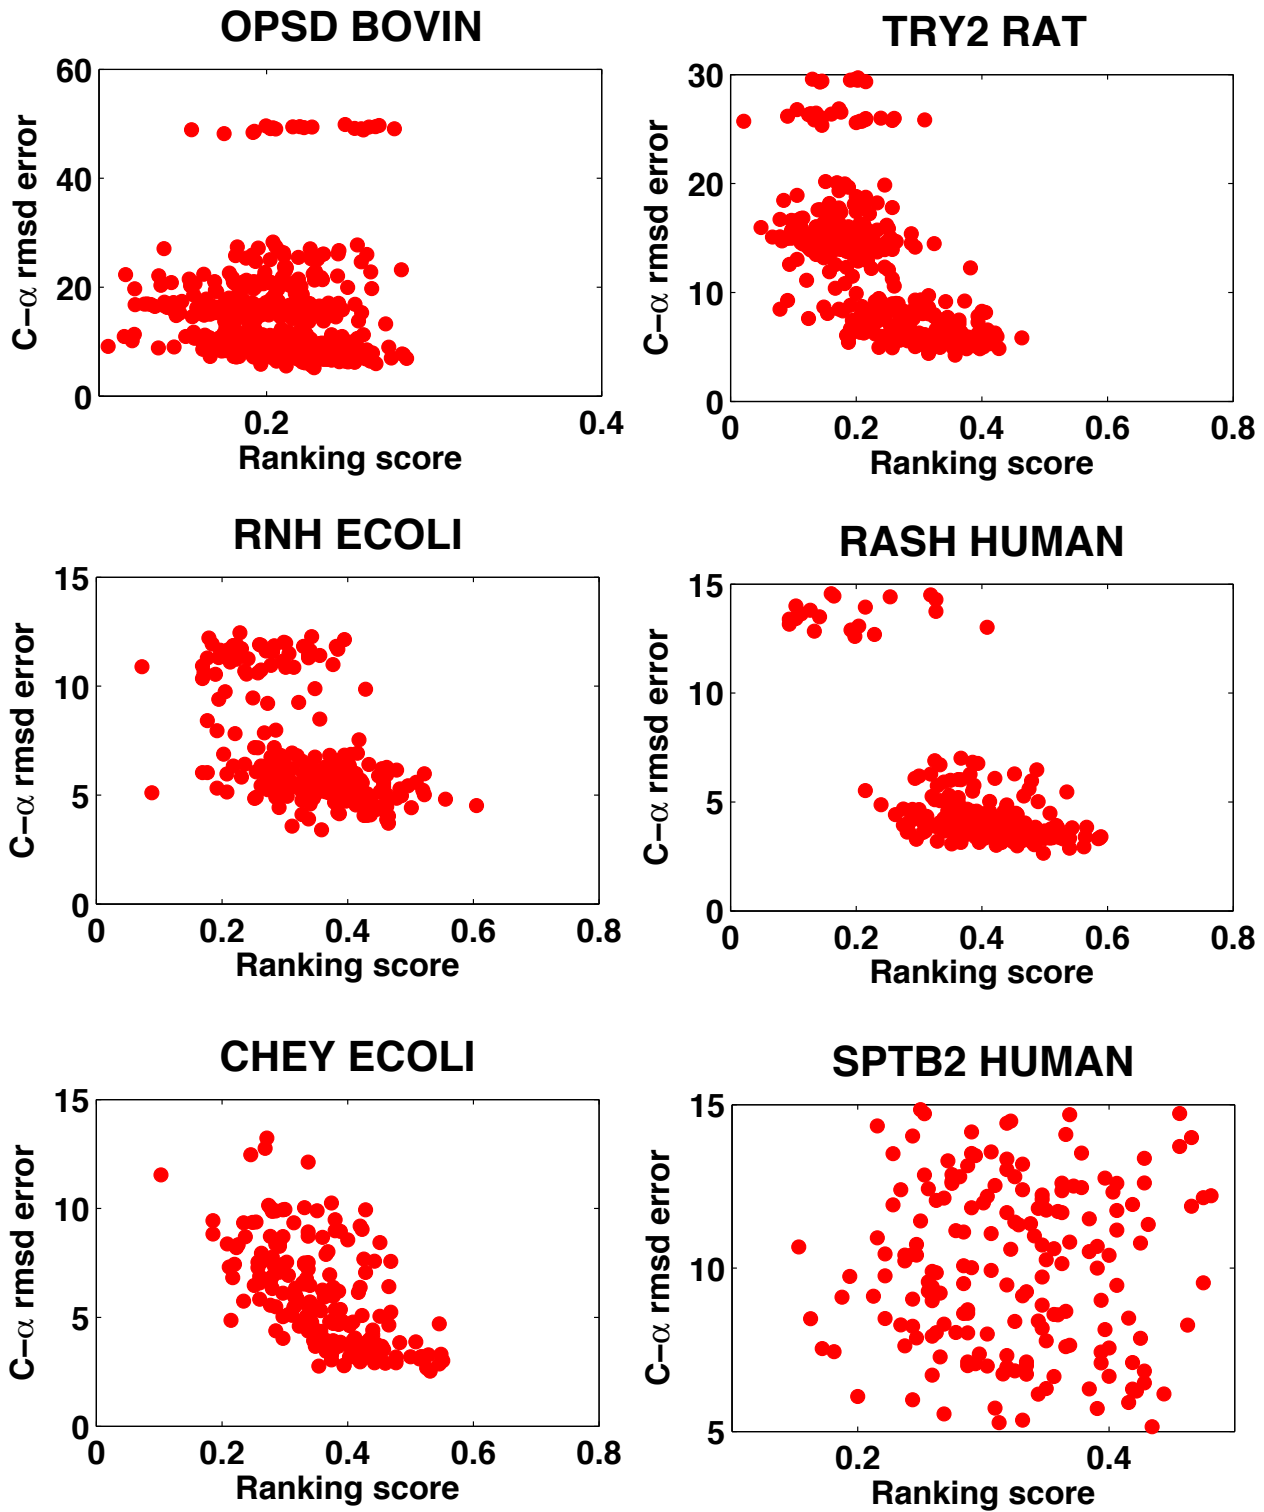

Figure S5. Discrimination accuracy of predicted structures.

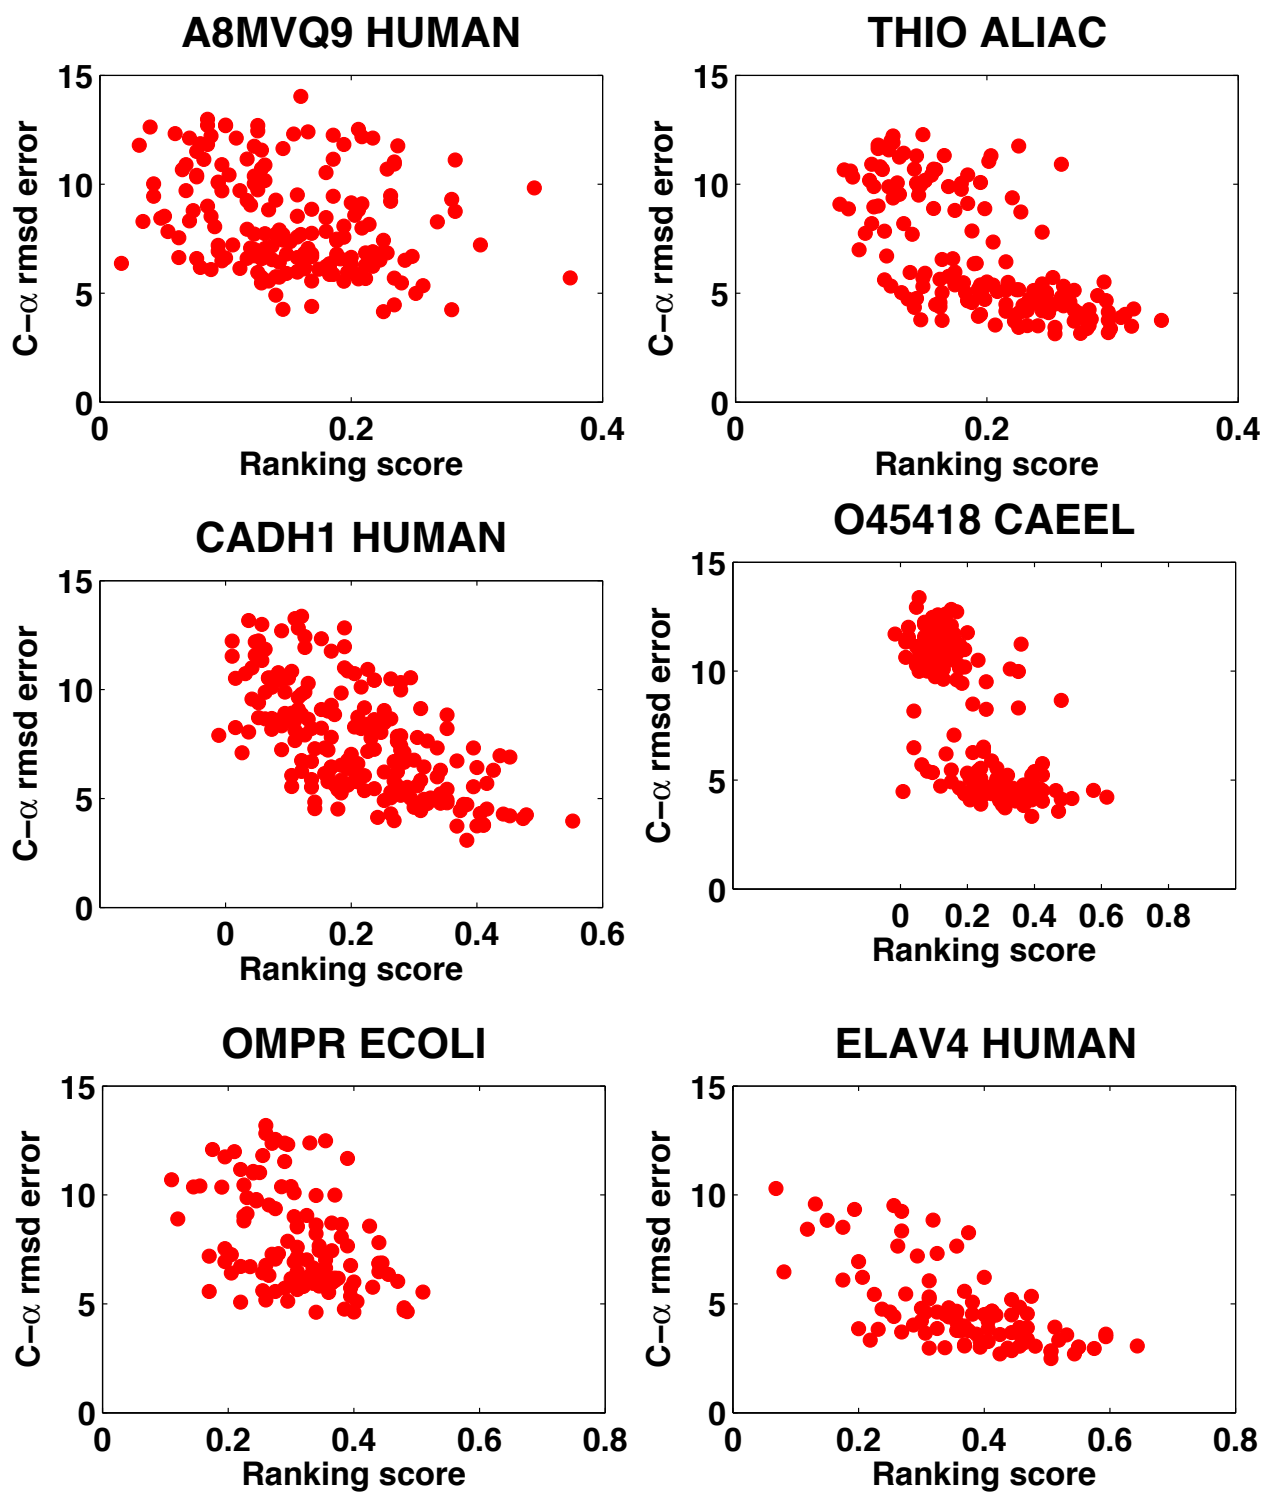

**Figure S5. Discrimination accuracy of predicted structures**

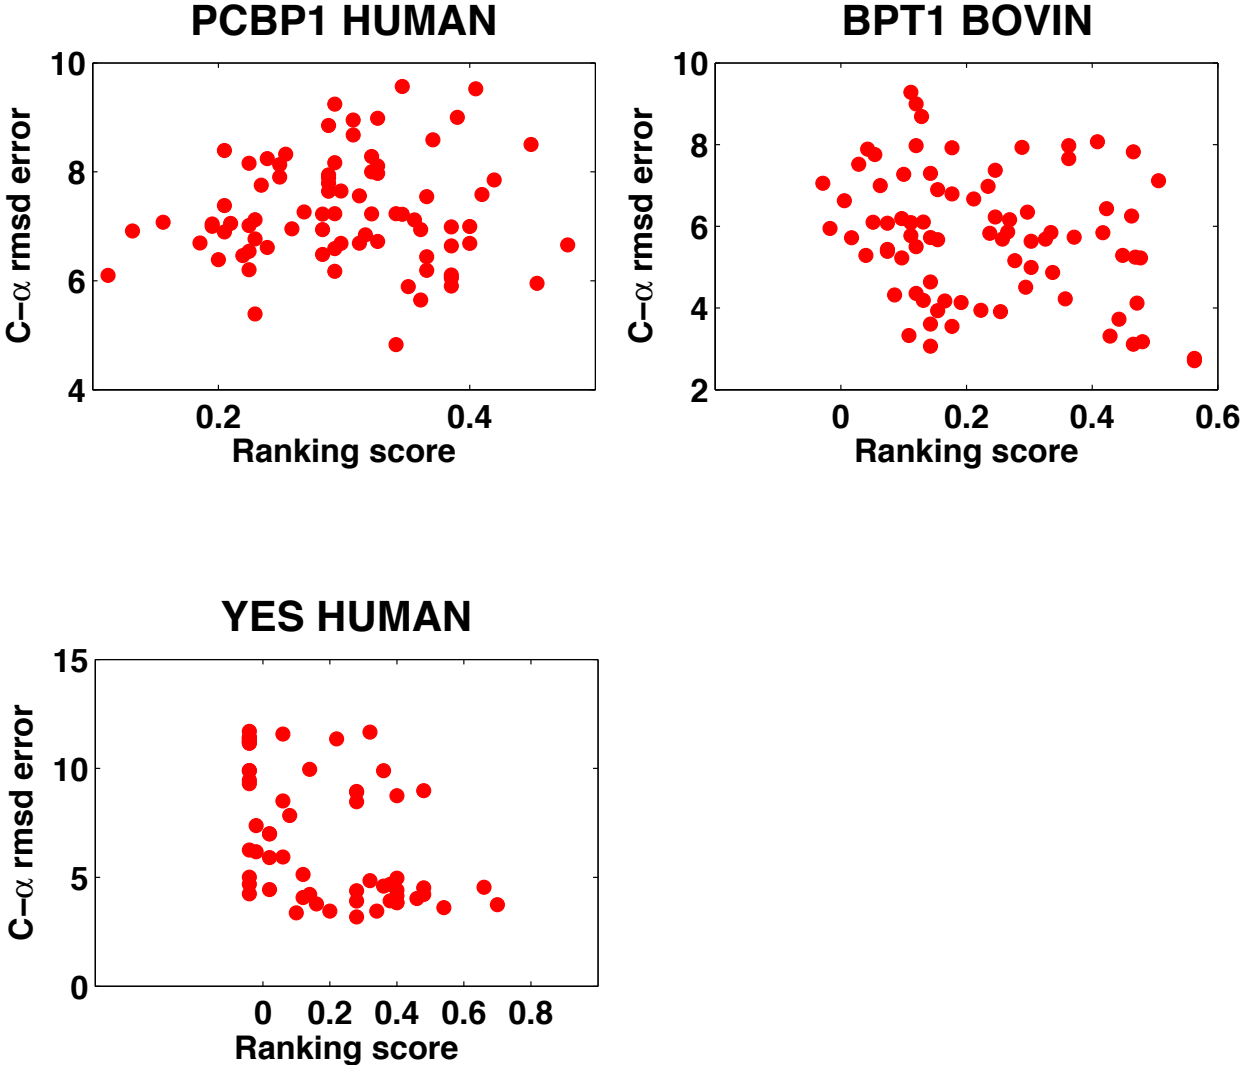

Supplement: pone.0028766.s005.pdf [file pone.0028766.s005.pdf]
