# Supplementary material for: Protein 3D Structure Computed from Evolutionary Sequence Variation
Source: PubMed Central journal article supplement (PMC3233603; doi:10.1371/journal.pone.0028766), 2011-12-07

Figure S6. True positive rate of predicted contacts for 4 methods

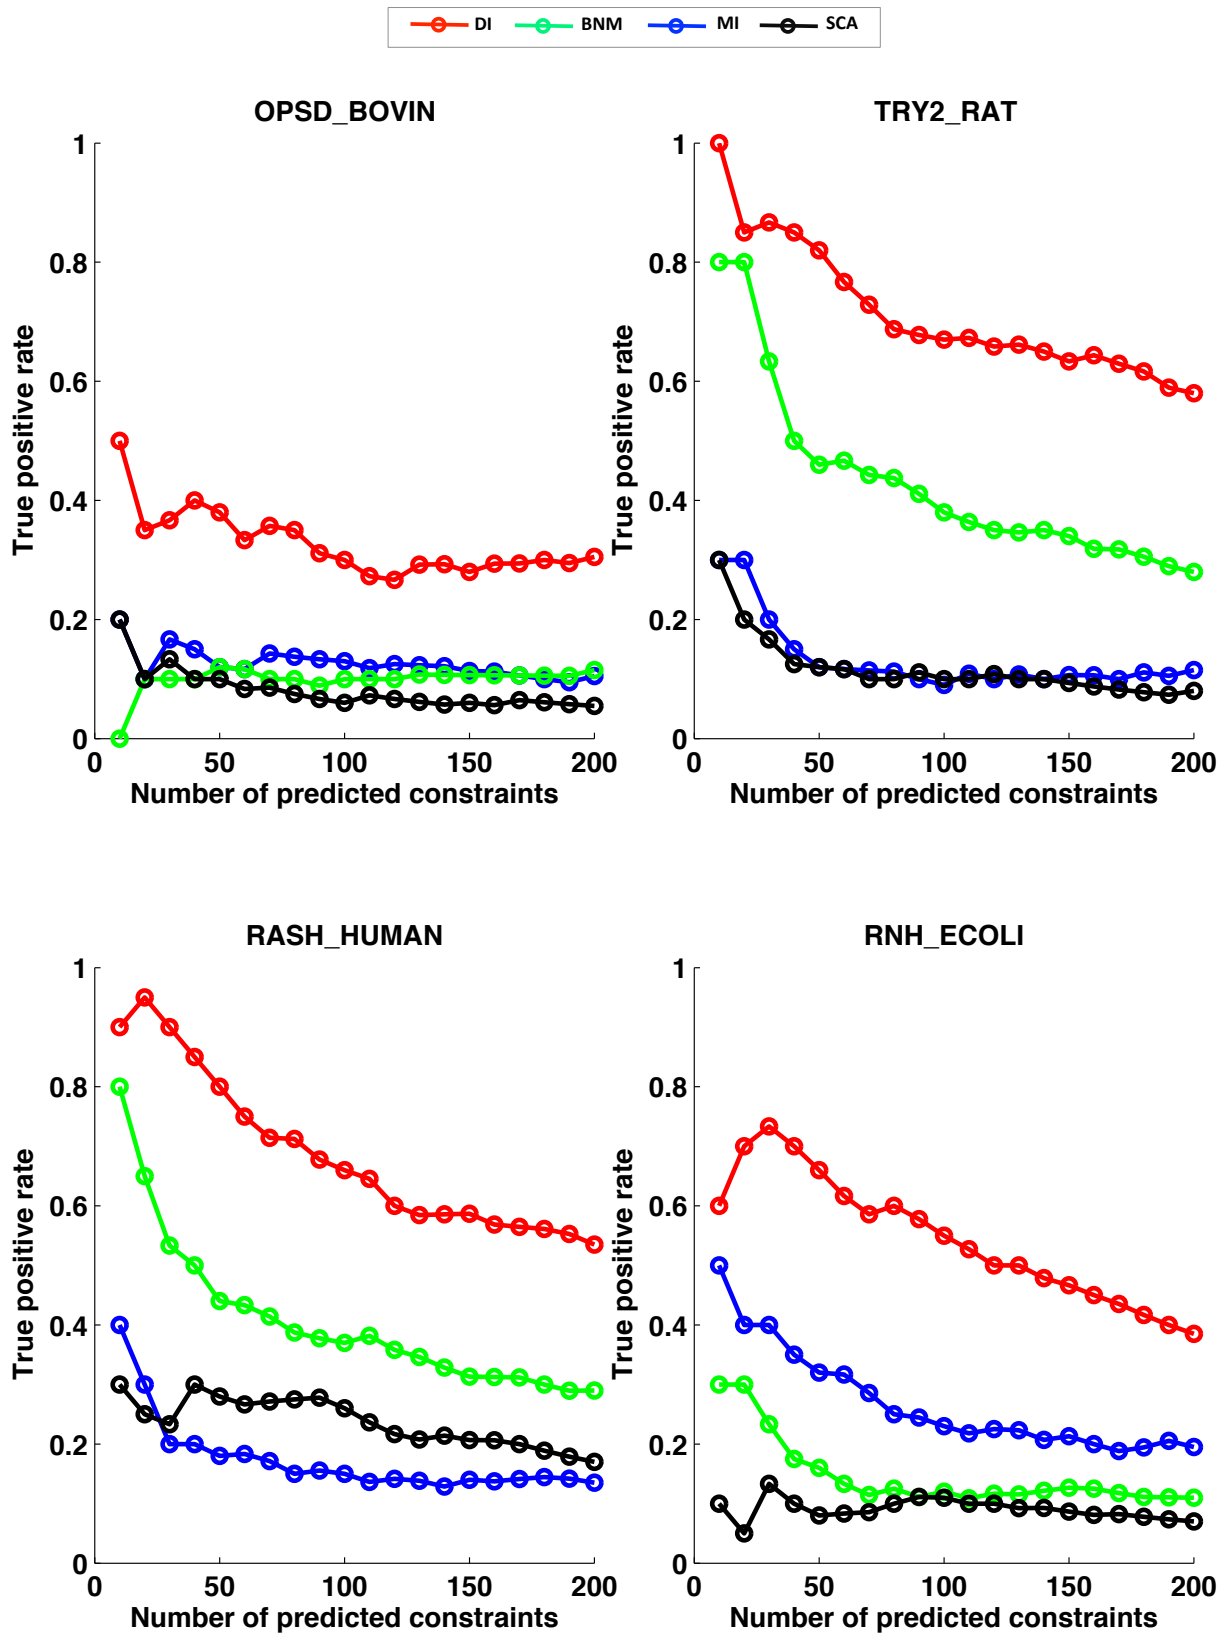

**Figure S6. True positive rate of predicted contacts for 4 methods**

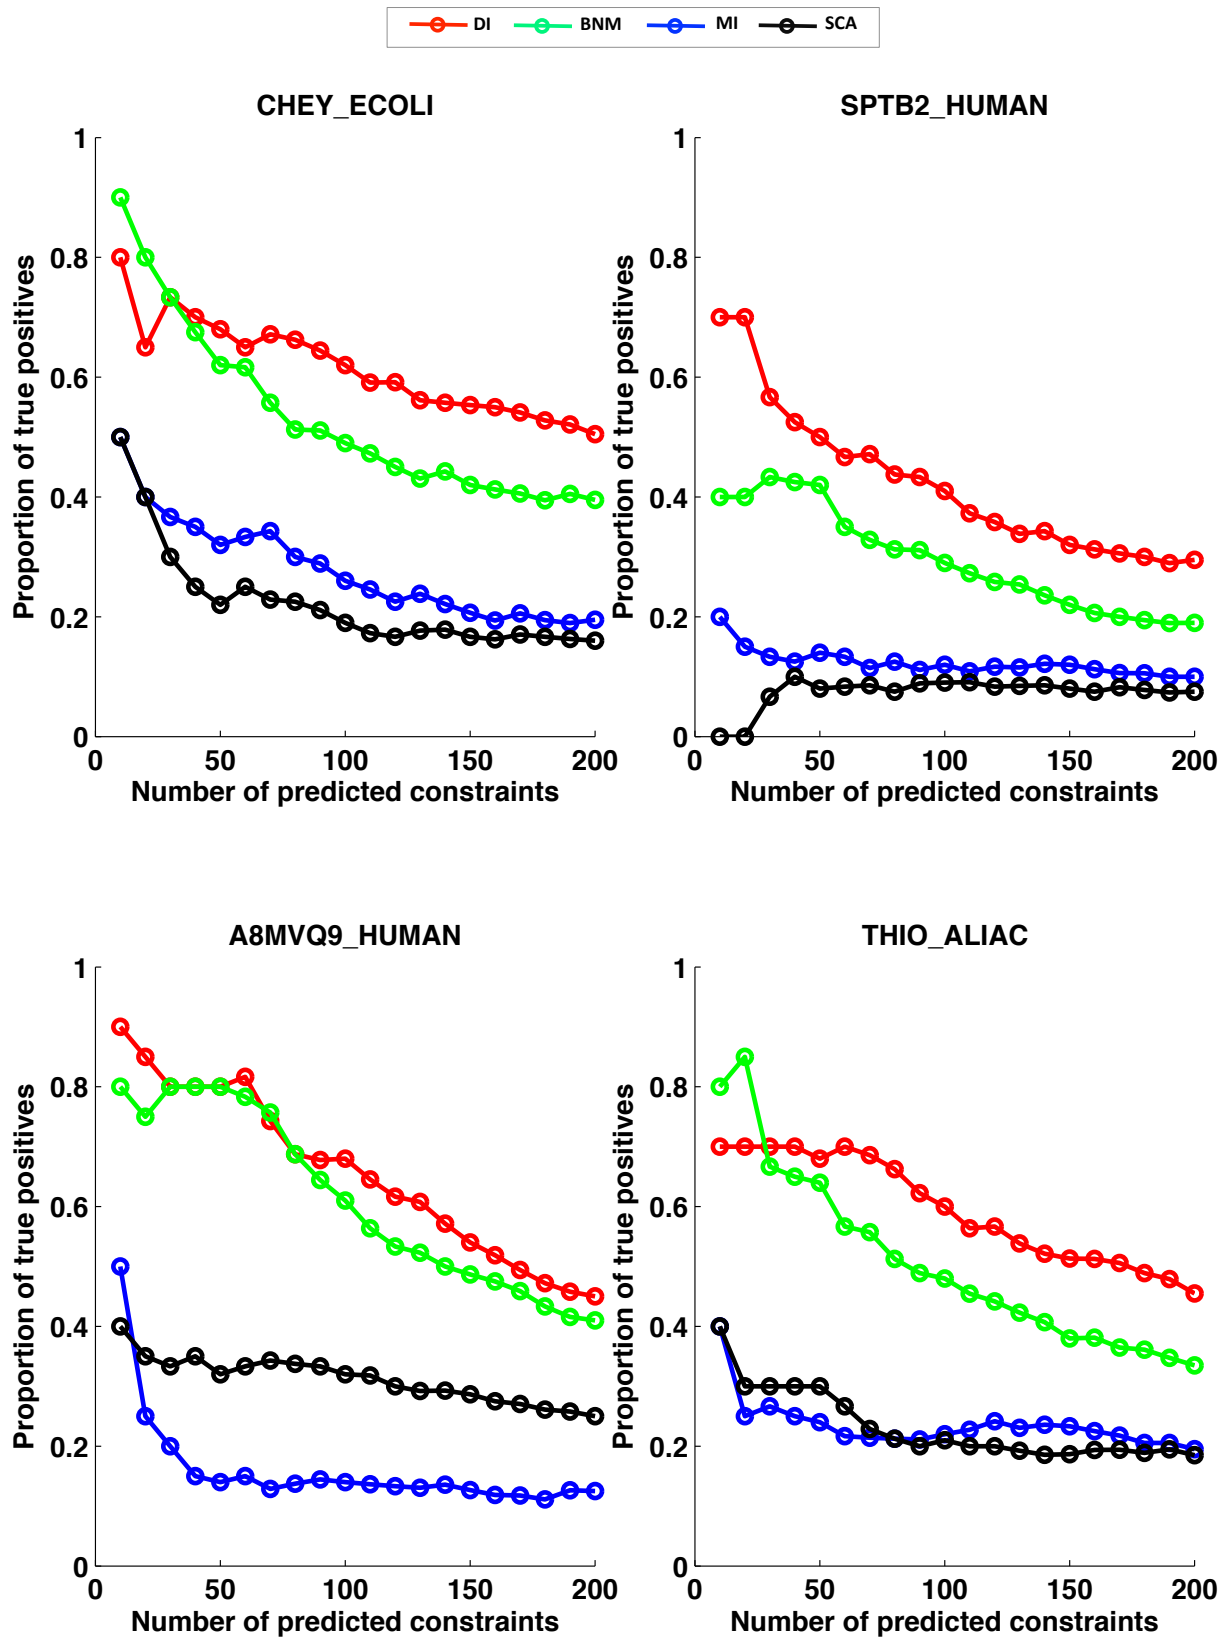

Figure S6. True positive rate of predicted contacts for 4 methods

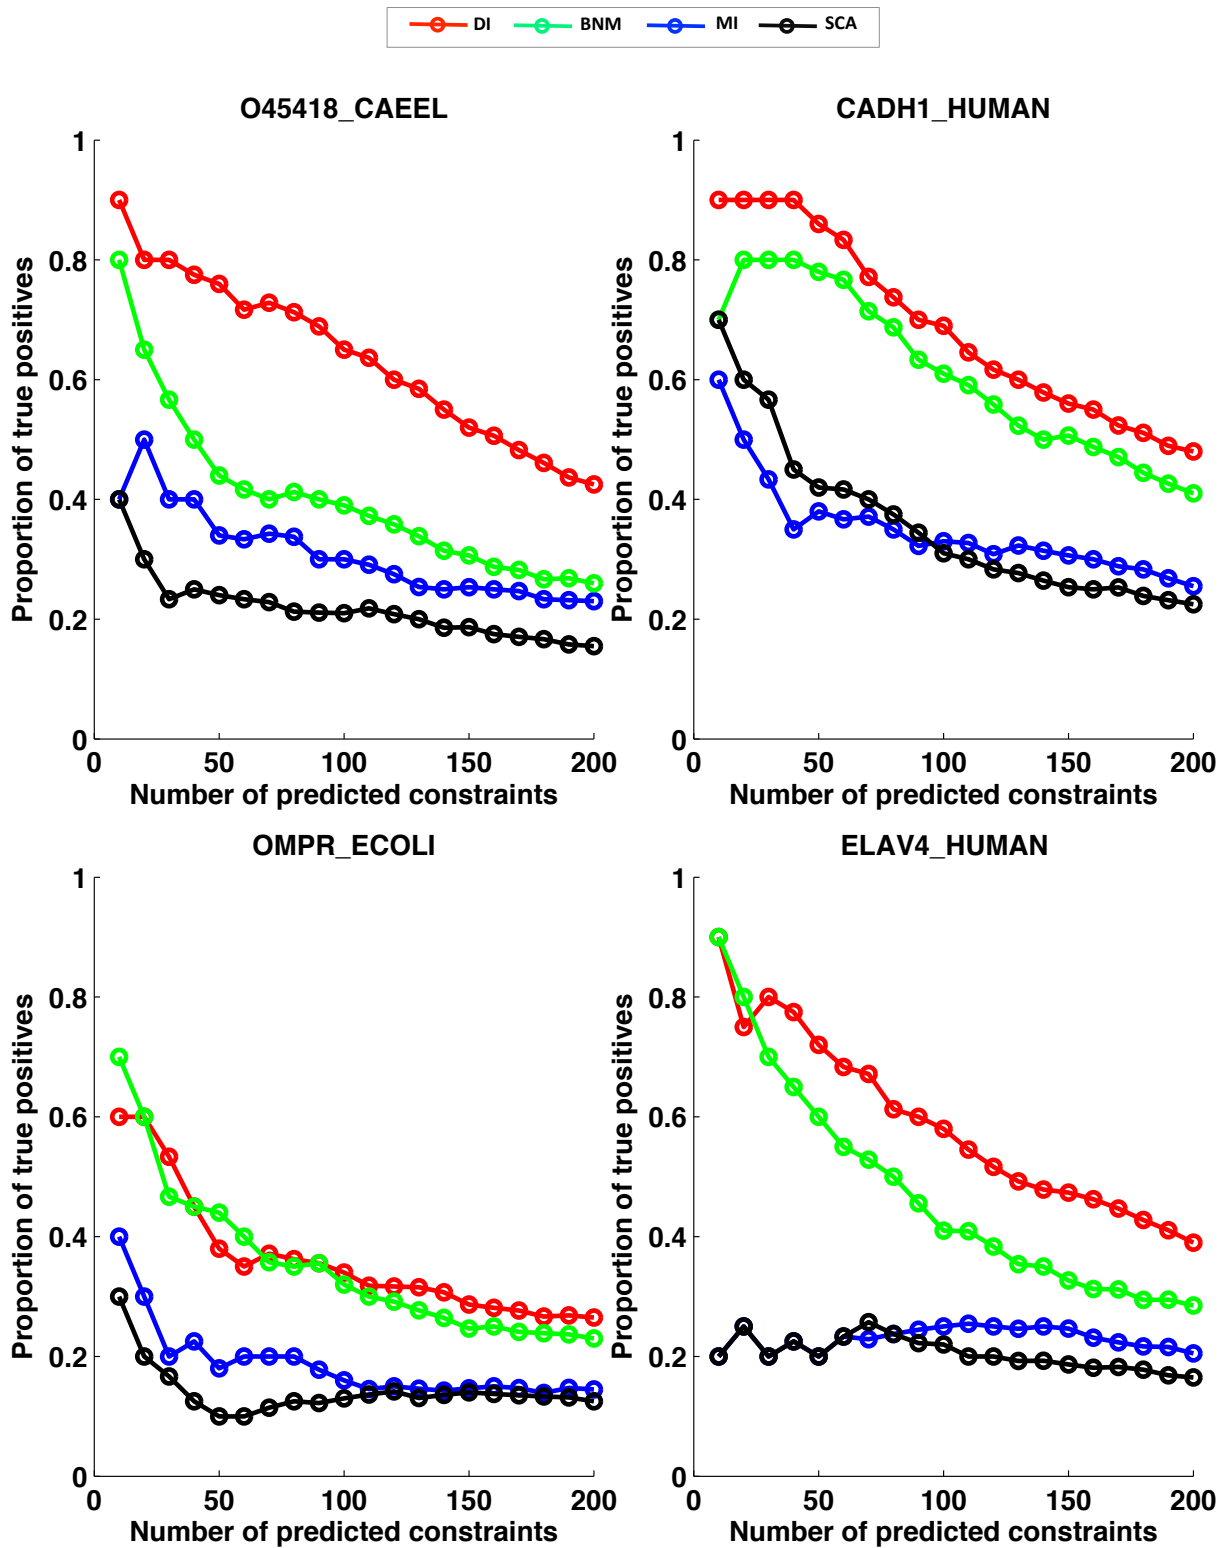

Figure S6. True positive rate of predicted contacts for 4 methods

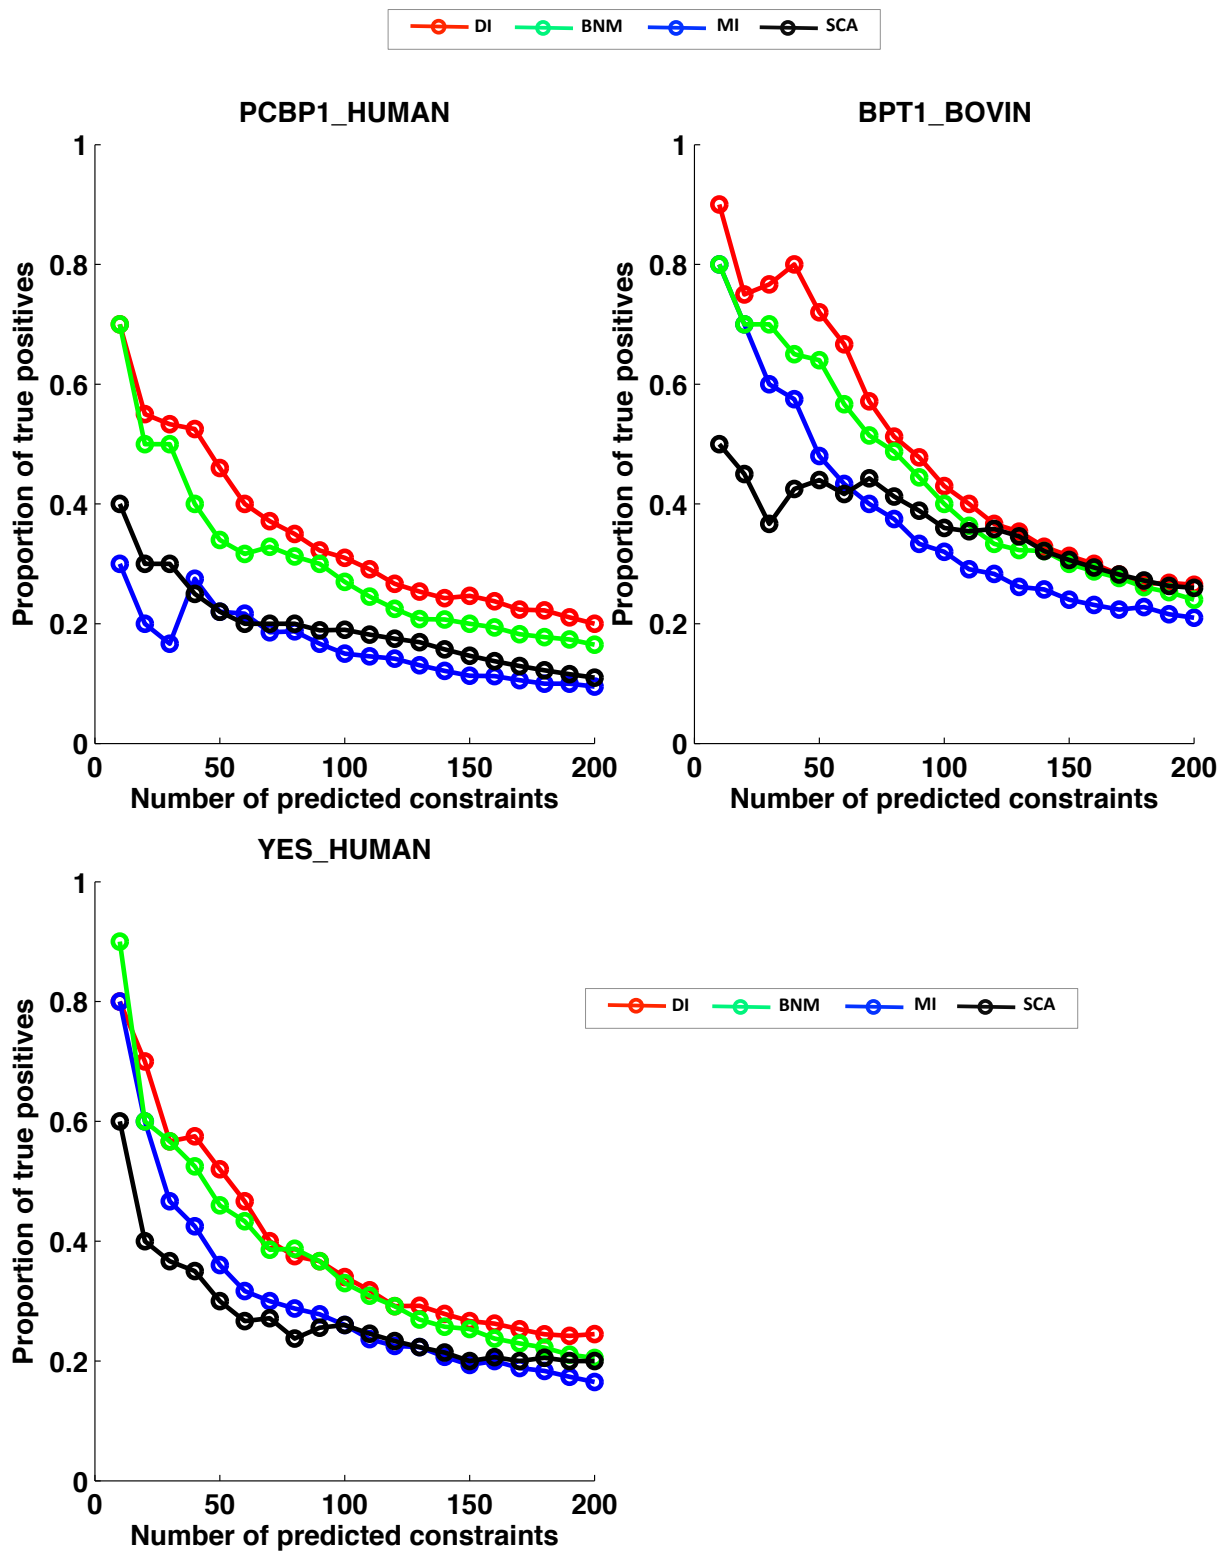

Supplement: pone.0028766.s006.pdf [file pone.0028766.s006.pdf]
