# Supplementary material for: Protein 3D Structure Computed from Evolutionary Sequence Variation
Source: PubMed Central journal article supplement (PMC3233603; doi:10.1371/journal.pone.0028766), 2011-12-07

Figure S9. Quantitative false positive assessment

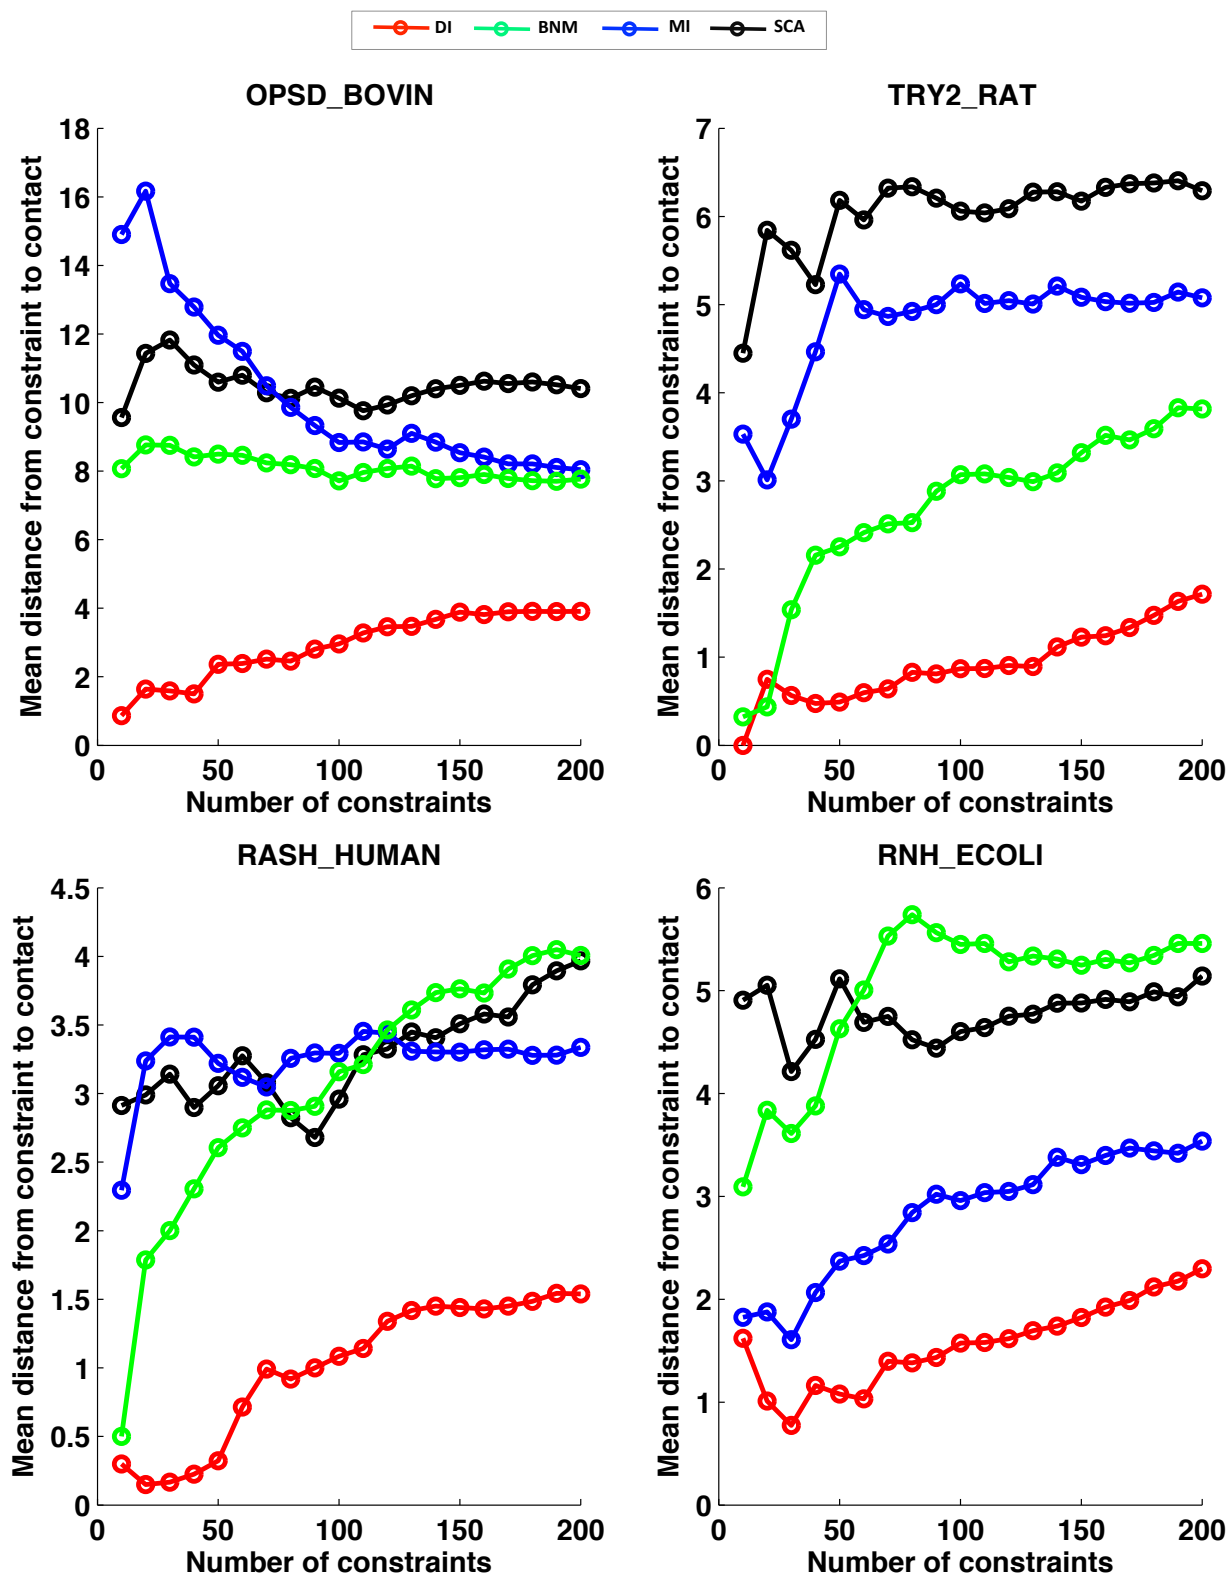

Figure S9. Quantitative false positive assessment

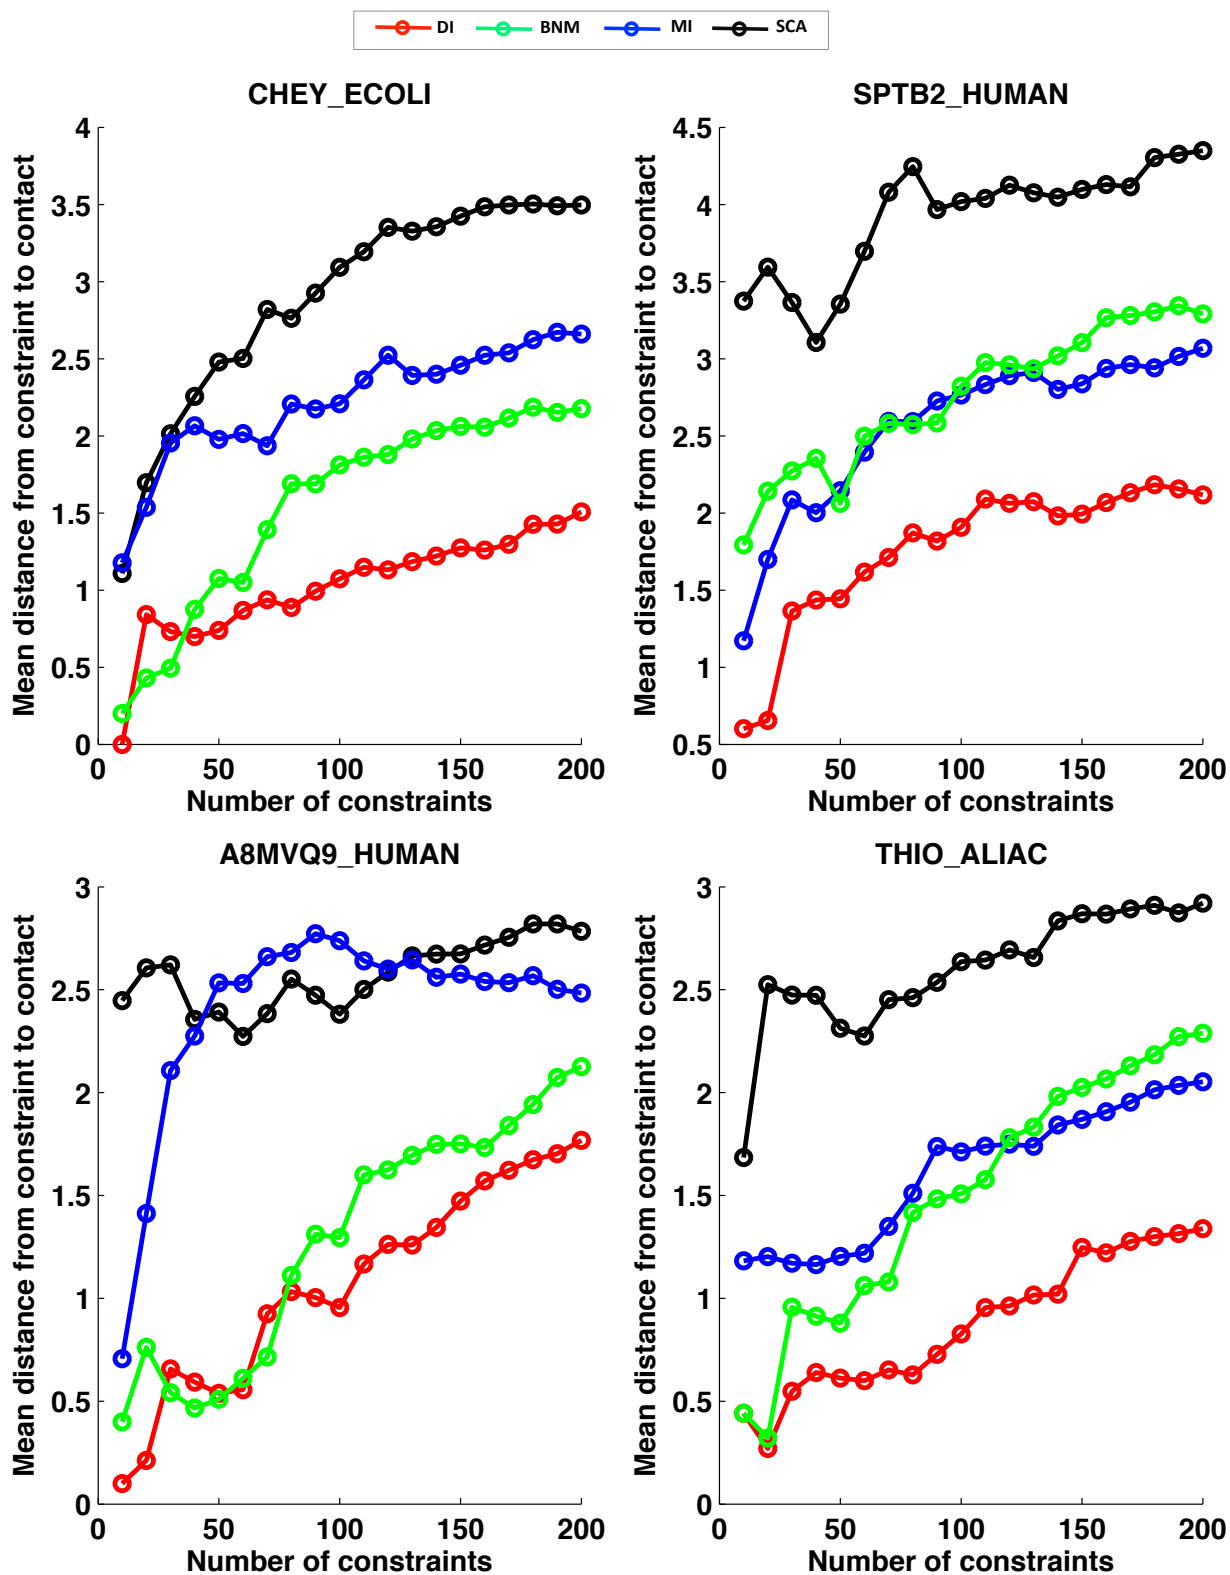

Figure S9. Quantitative false positive assessment

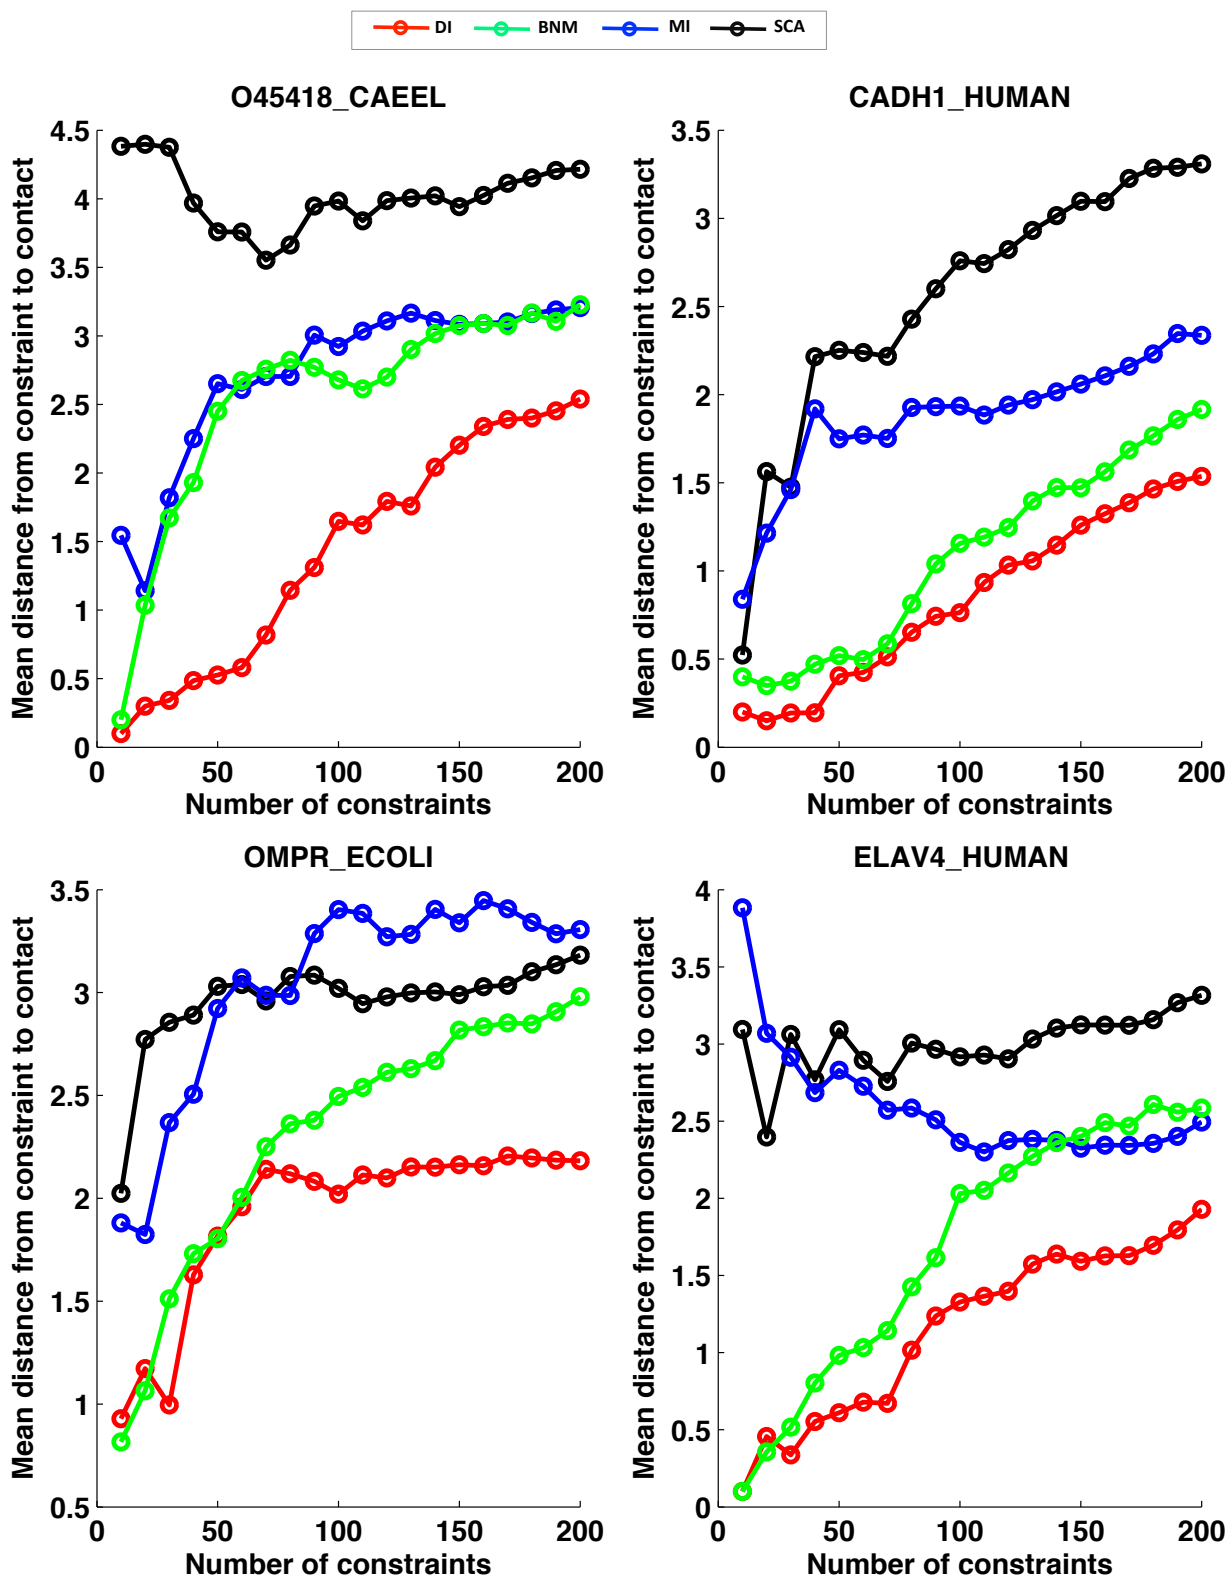

Figure S9. Quantitative false positive assessment

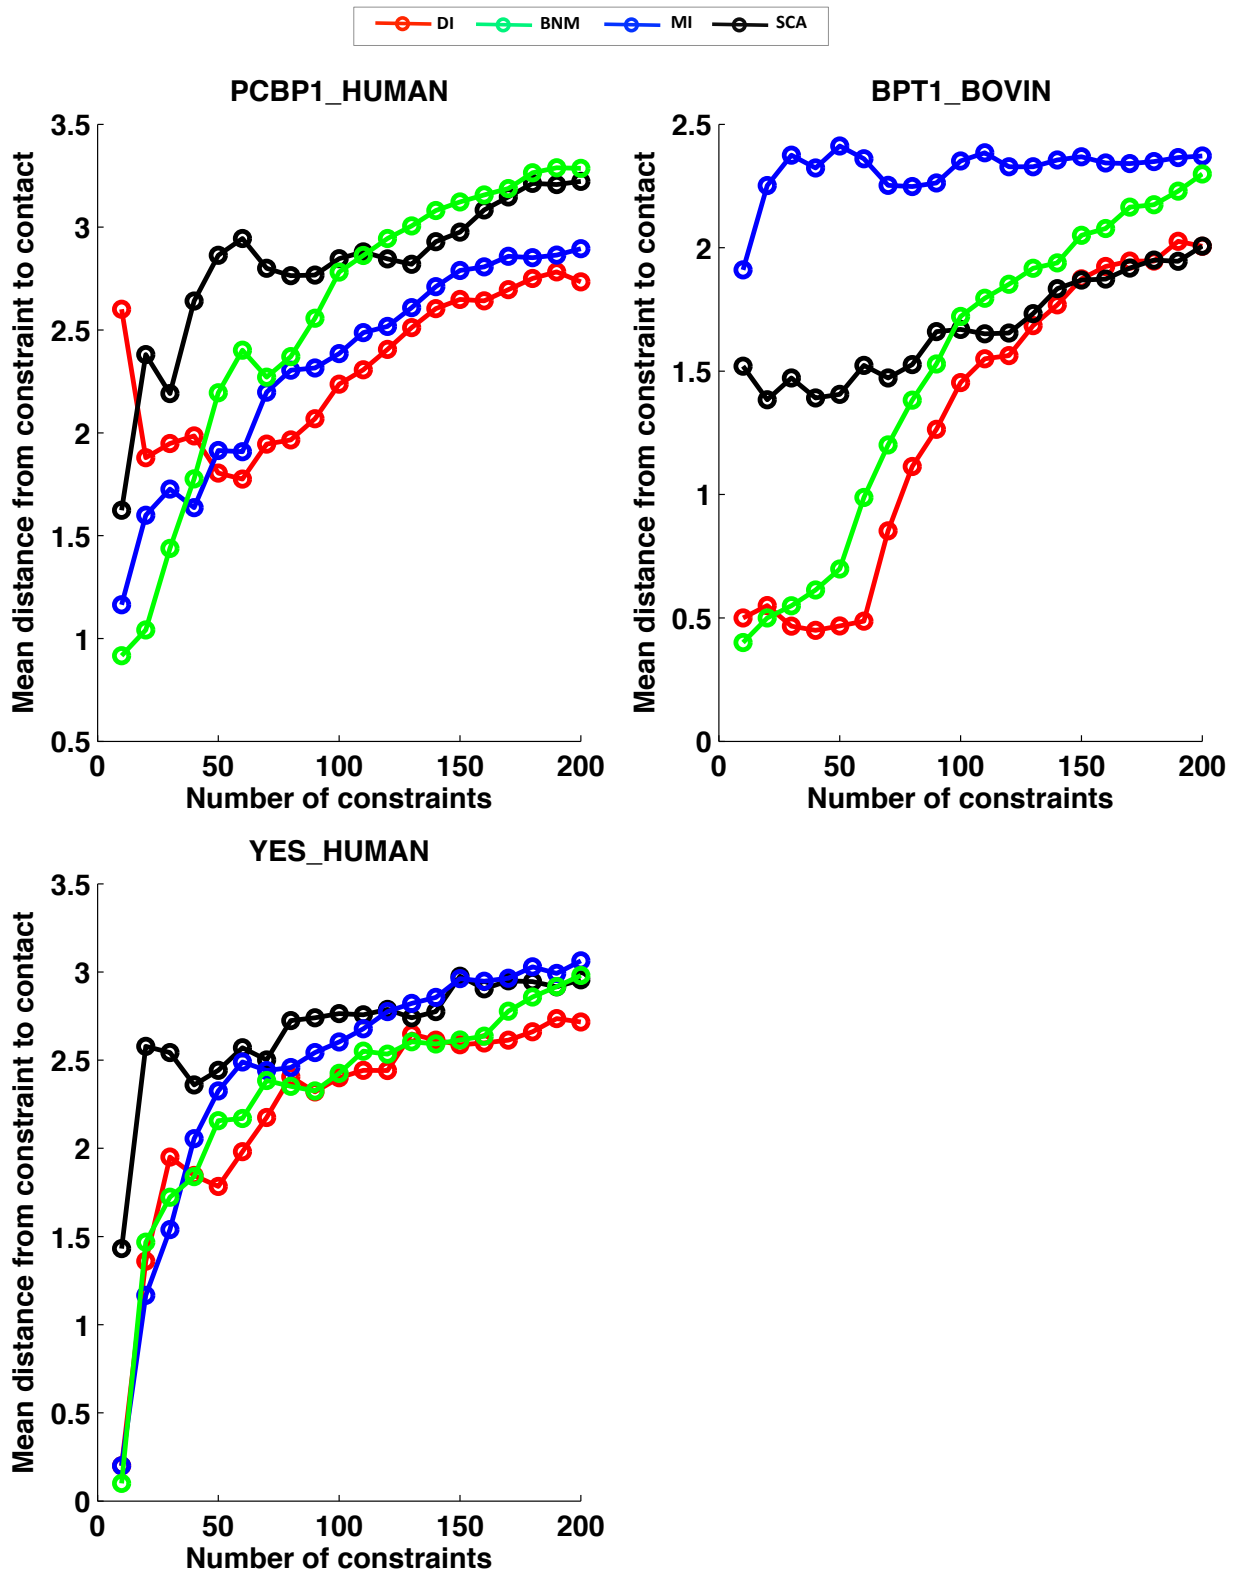

Supplement: pone.0028766.s009.pdf [file pone.0028766.s009.pdf]
