# Supplementary material for: Protein 3D Structure Computed from Evolutionary Sequence Variation
Source: PubMed Central journal article supplement (PMC3233603; doi:10.1371/journal.pone.0028766), 2011-12-07

Figure S10. Quantitative assessment of spread of predicted contacts

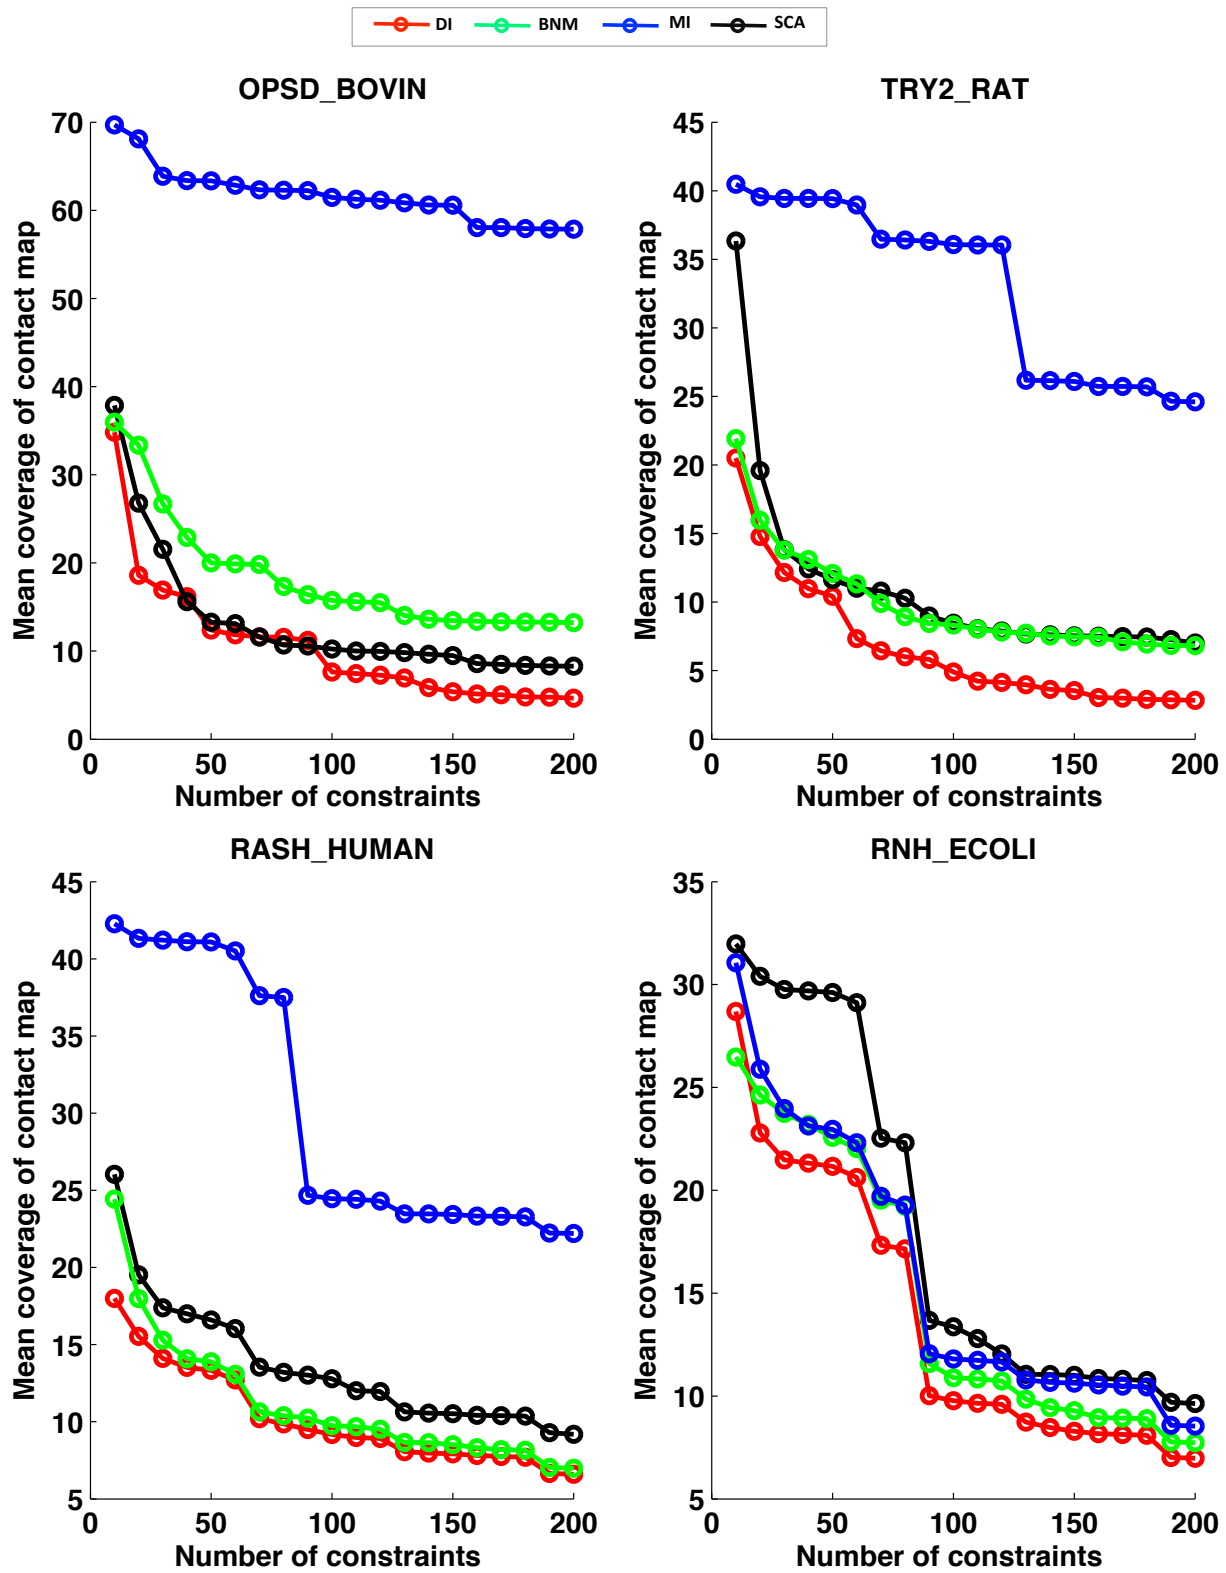

Figure S10. Quantitative assessment of spread of predicted contacts

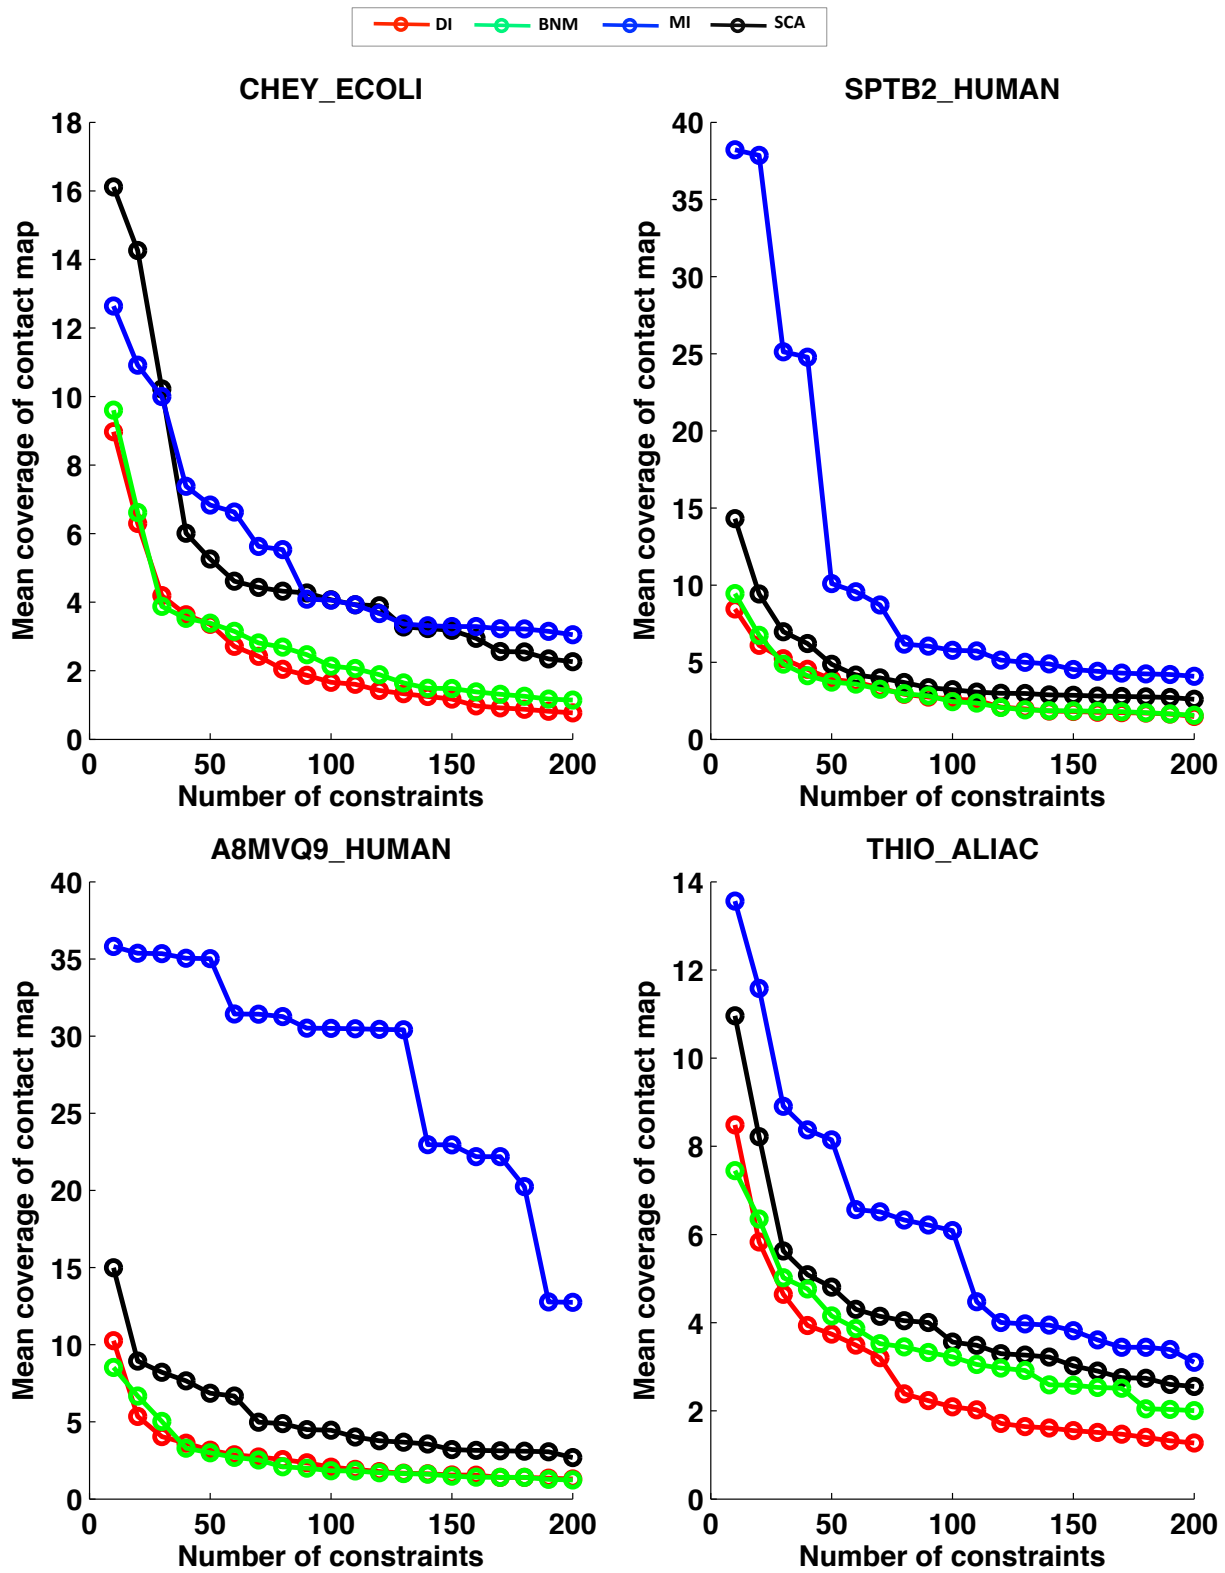

Figure S10. Quantitative assessment of spread of predicted contacts

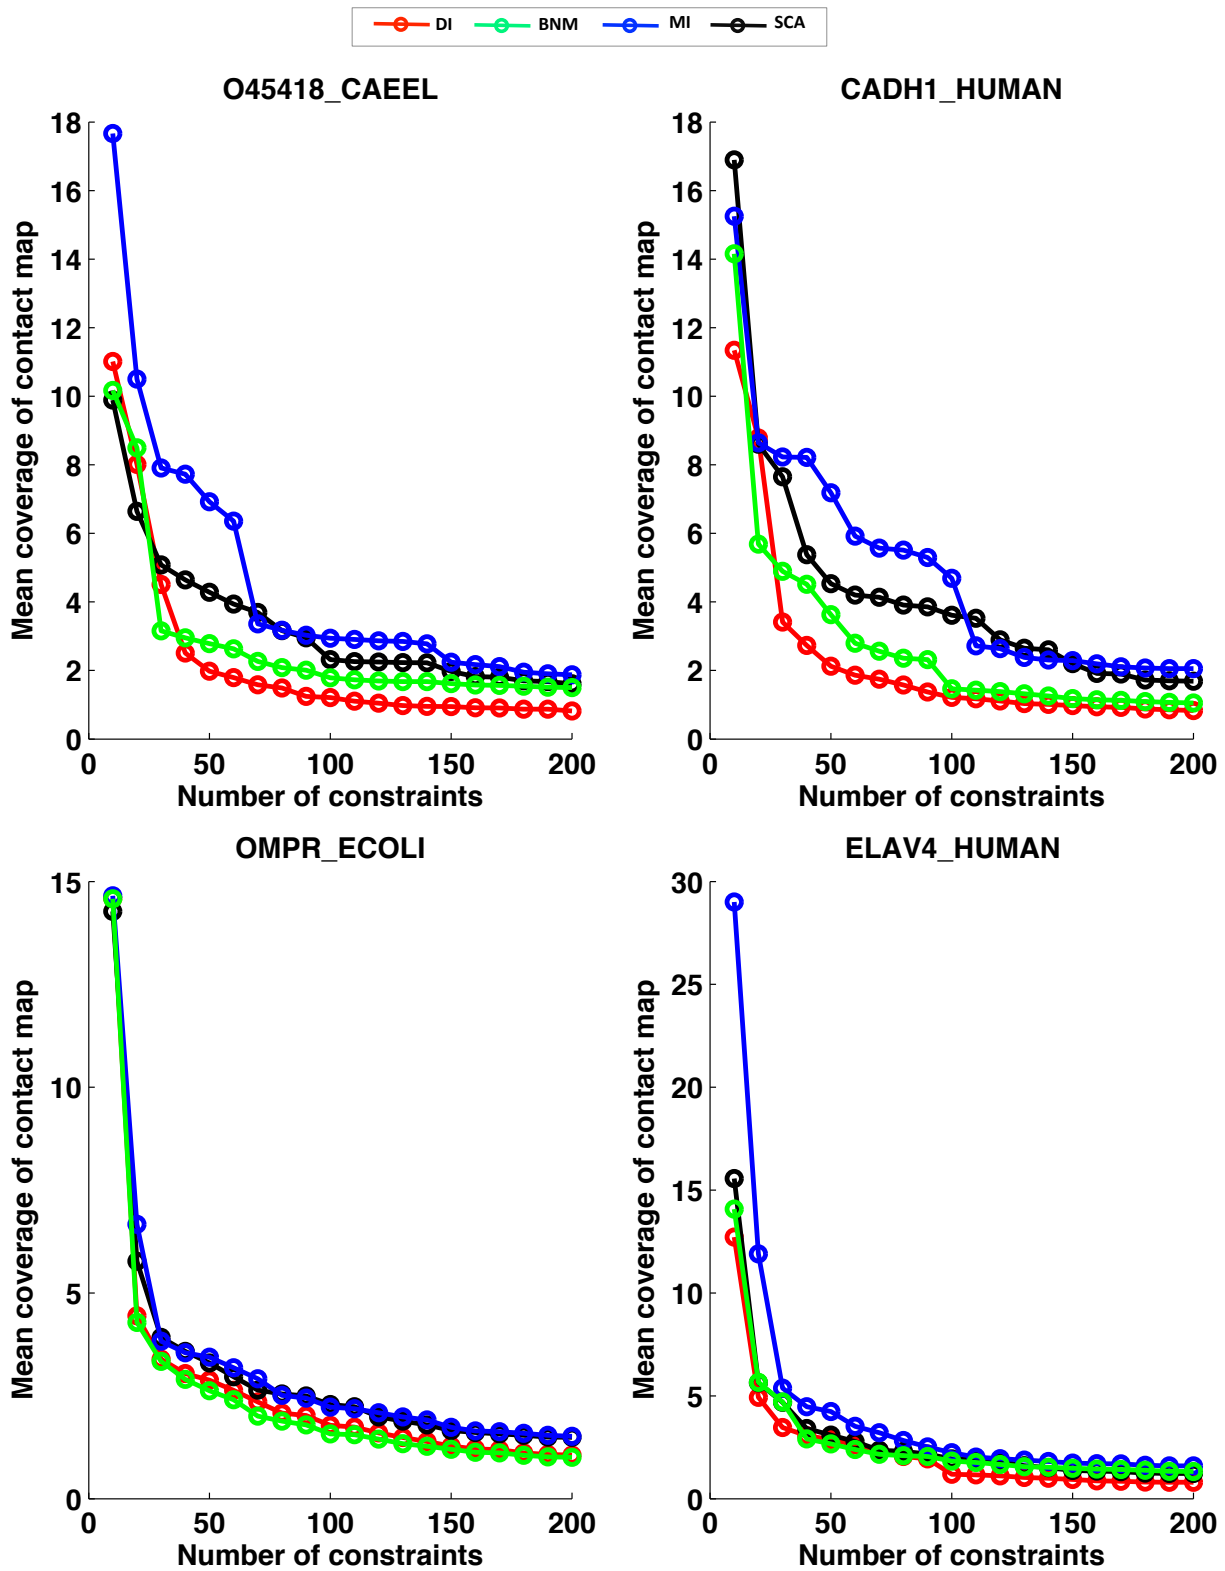

Figure S10. Quantitative assessment of spread of predicted contacts

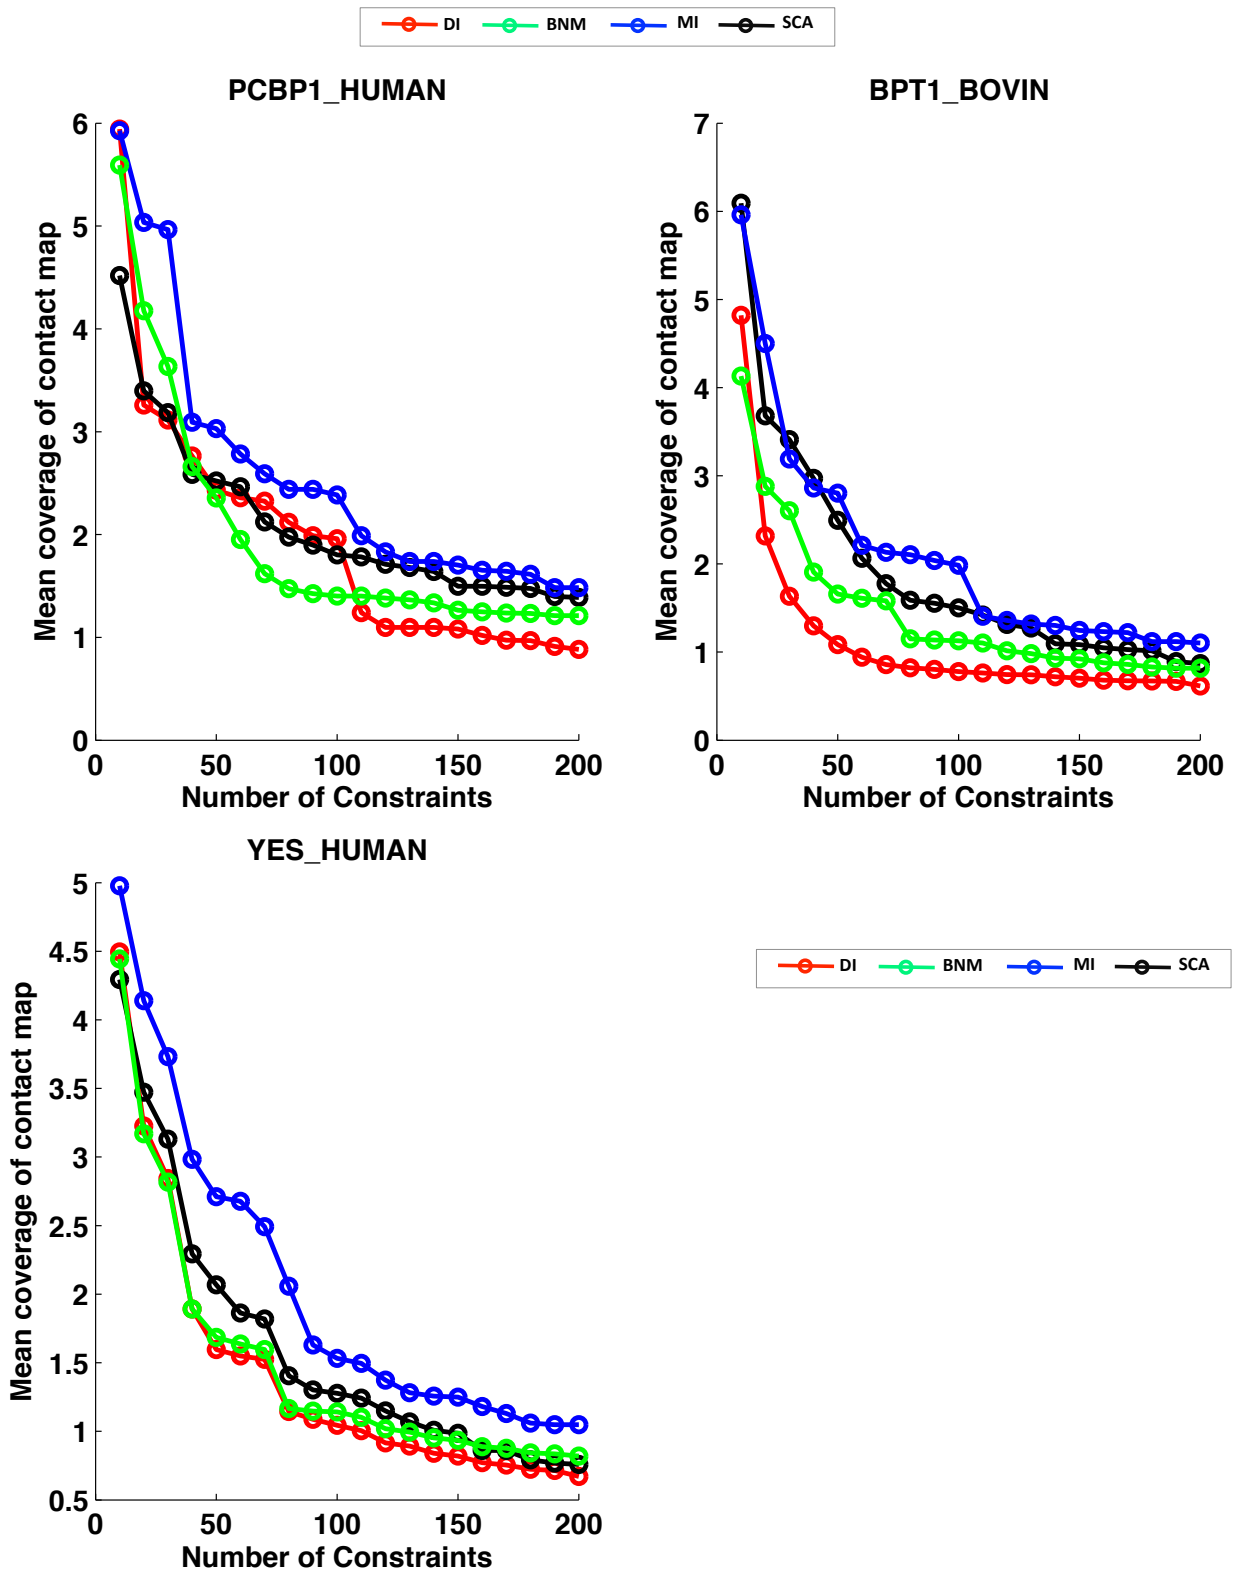

Supplement: pone.0028766.s010.pdf [file pone.0028766.s010.pdf]
