# Supplementary material for: Protein 3D Structure Computed from Evolutionary Sequence Variation
Source: PubMed Central journal article supplement (PMC3233603; doi:10.1371/journal.pone.0028766), 2011-12-07

Figure S11. Bayesian Network Model (BNM) contact maps.

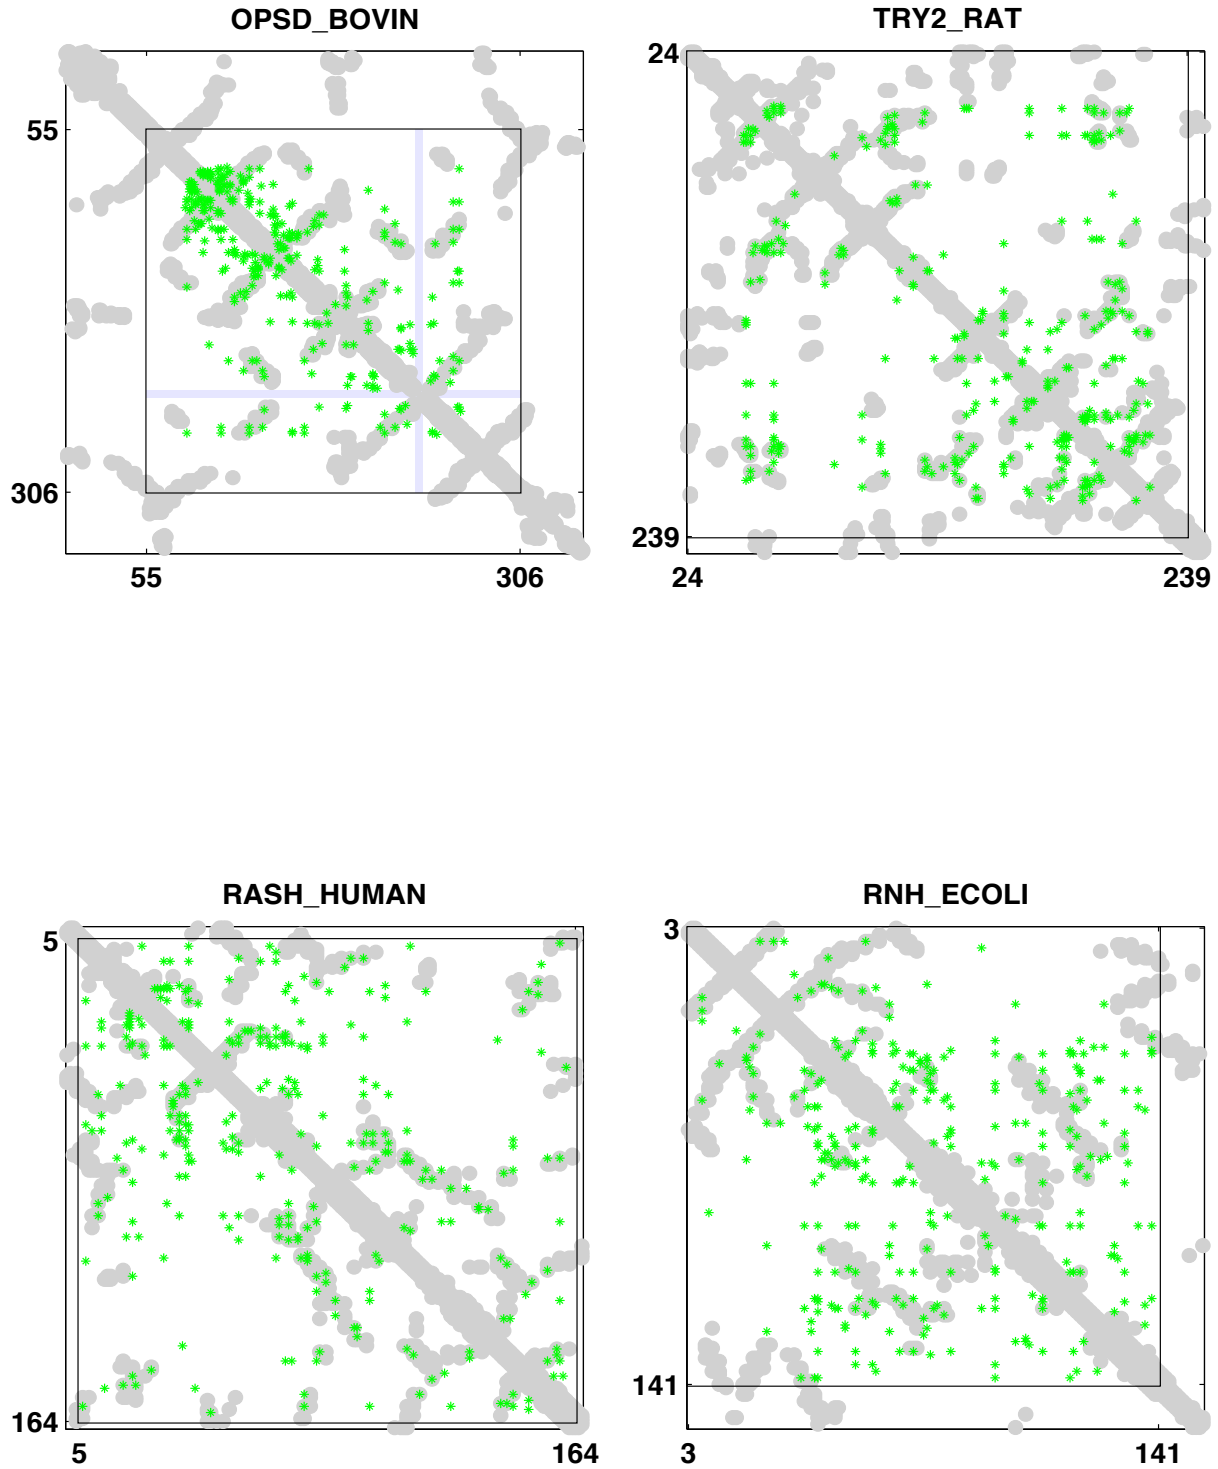

**Figure S11. Bayesian Network Model (BNM) contact maps.**

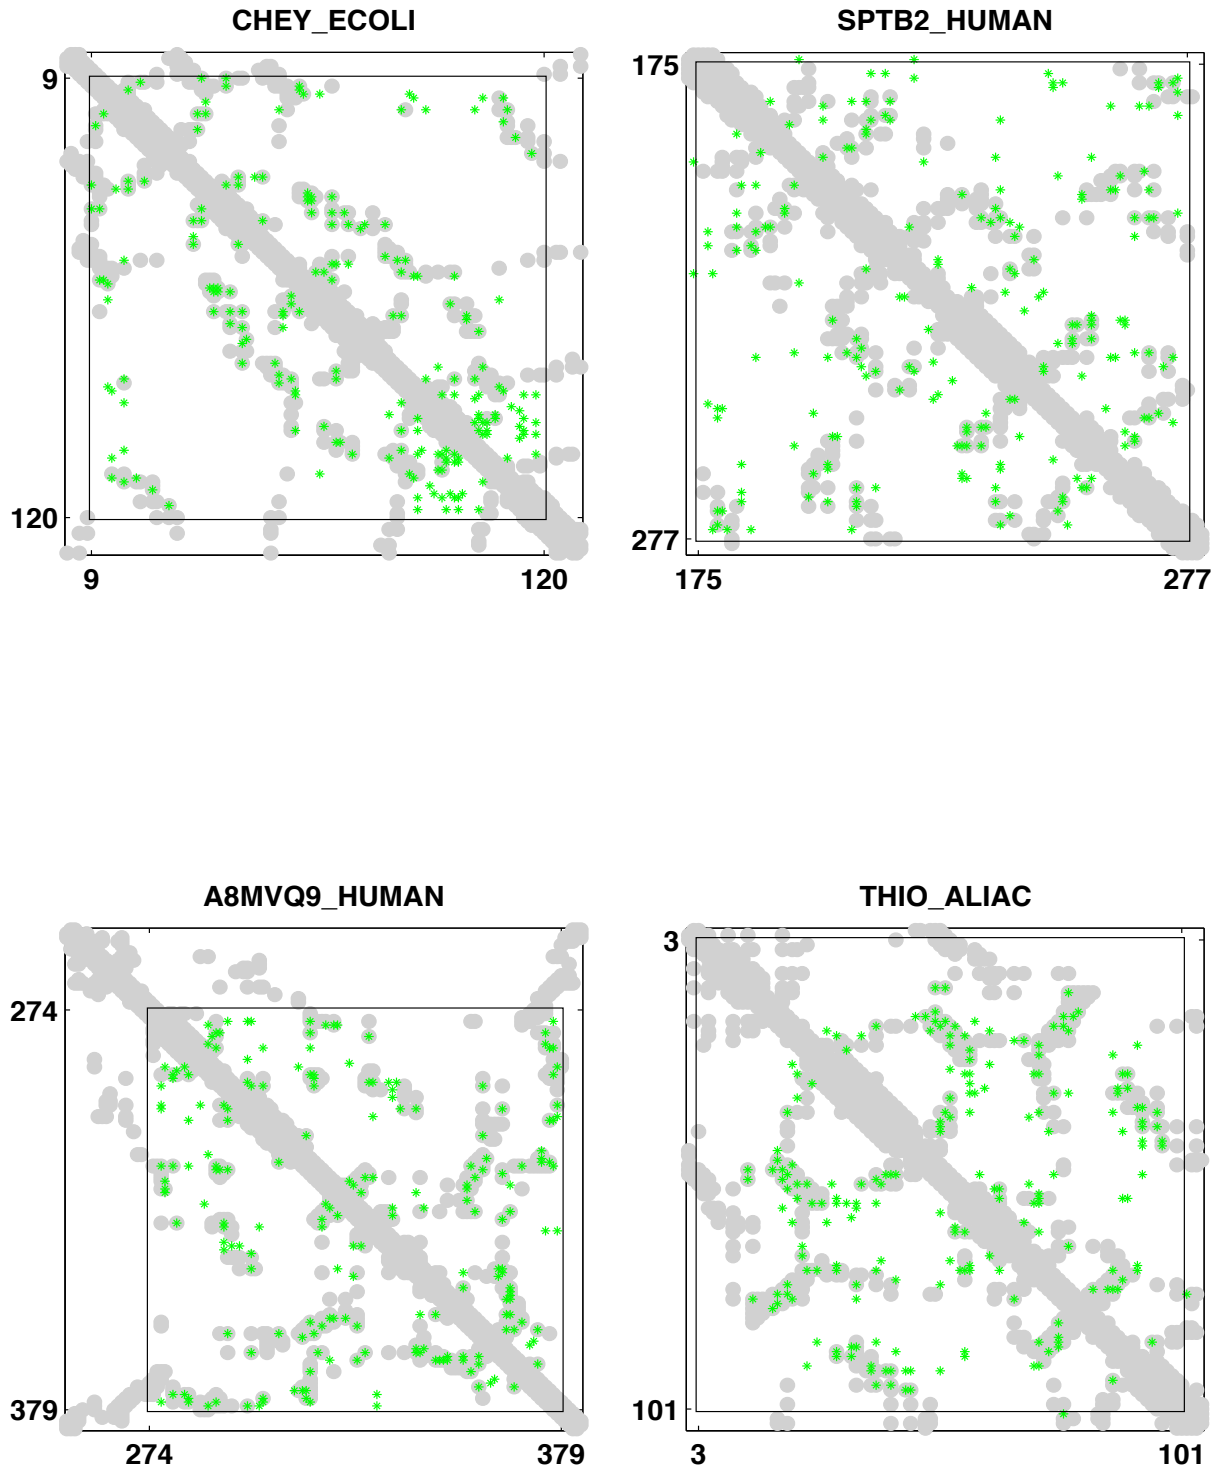

**Figure S11. Bayesian Network Model (BNM) contact maps.**

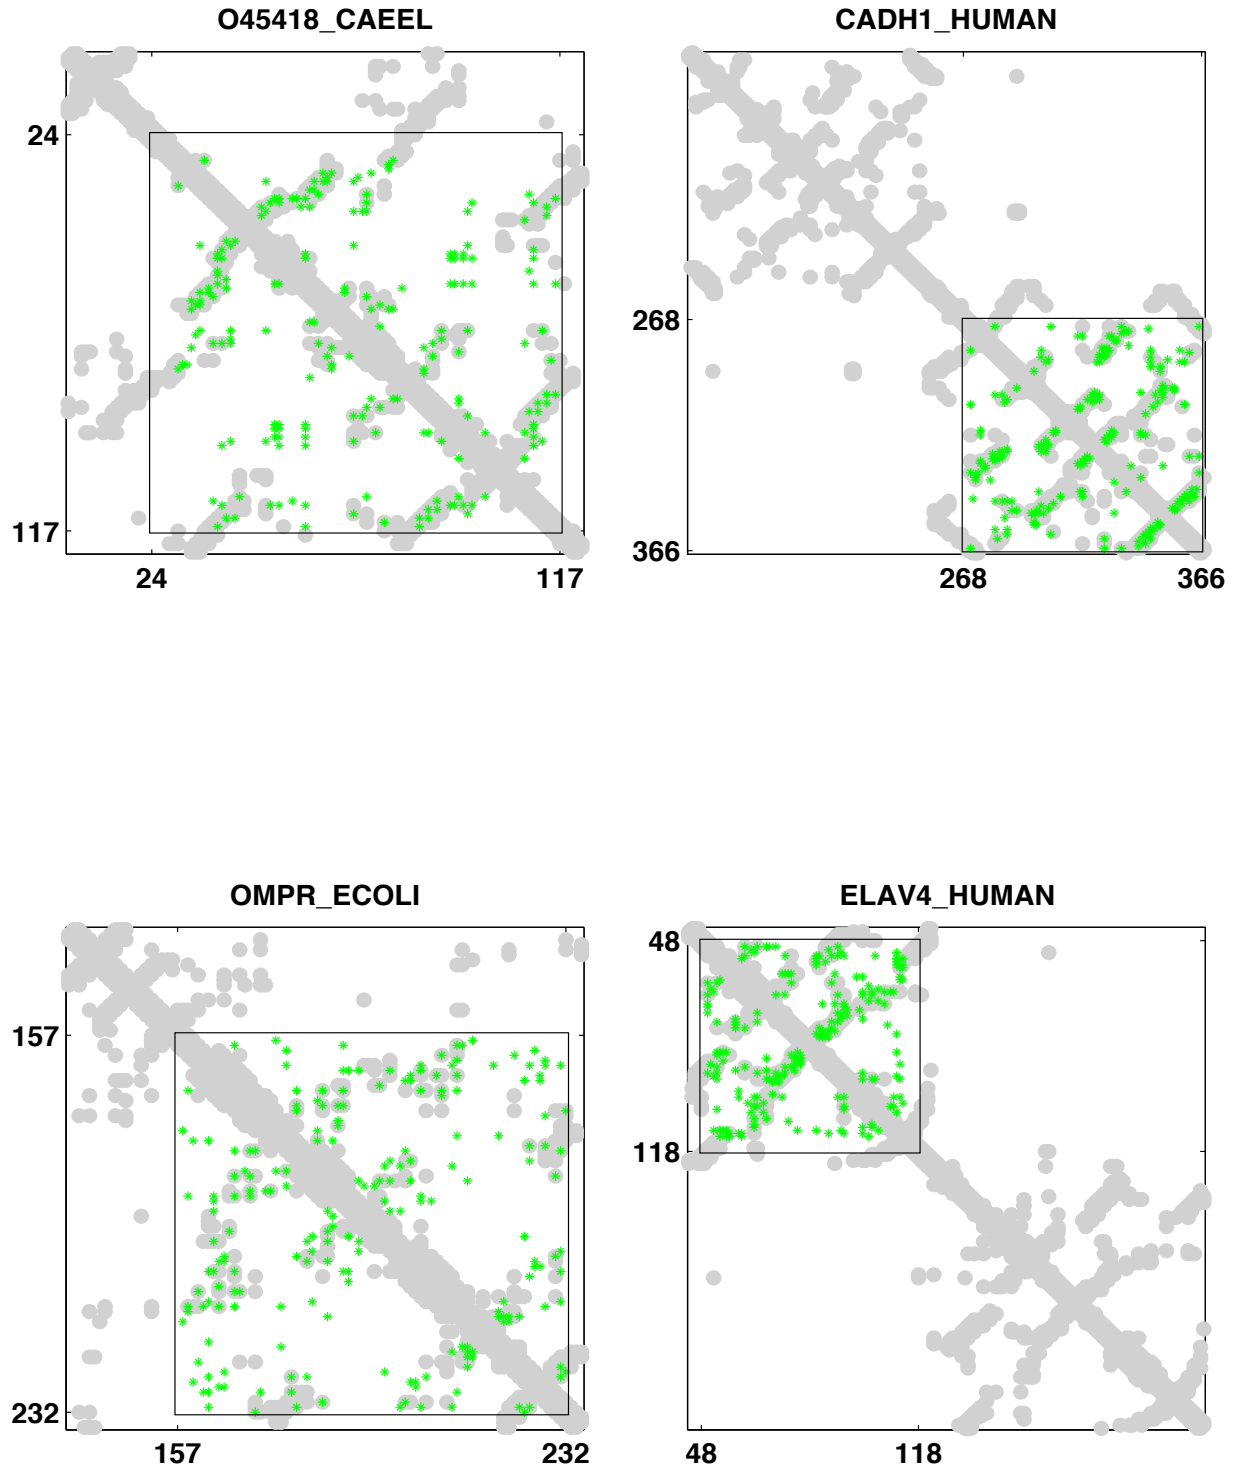

**Figure S11. Bayesian Network Model (BNM) contact maps.**

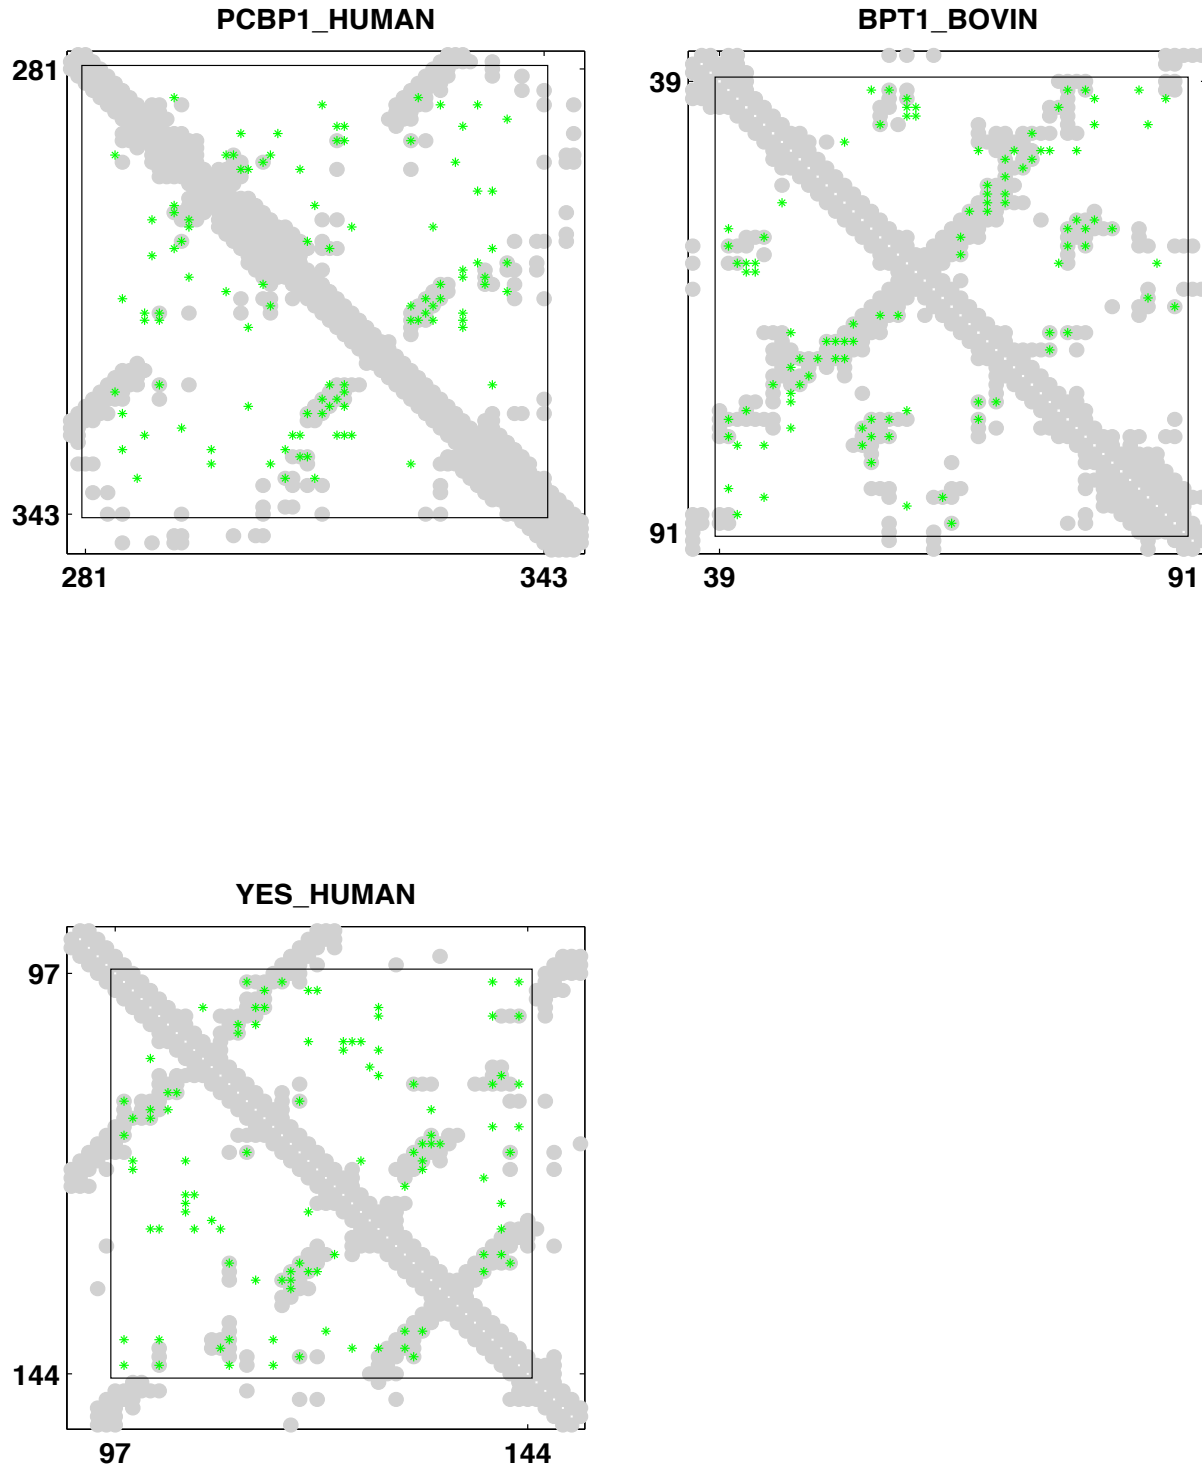

Supplement: pone.0028766.s011.pdf [file pone.0028766.s011.pdf]
