# Supplementary material for: Protein 3D Structure Computed from Evolutionary Sequence Variation
Source: PubMed Central journal article supplement (PMC3233603; doi:10.1371/journal.pone.0028766), 2011-12-07

**Figure S15. The minimum atom distance of top 200 ranked SCA pairs.**

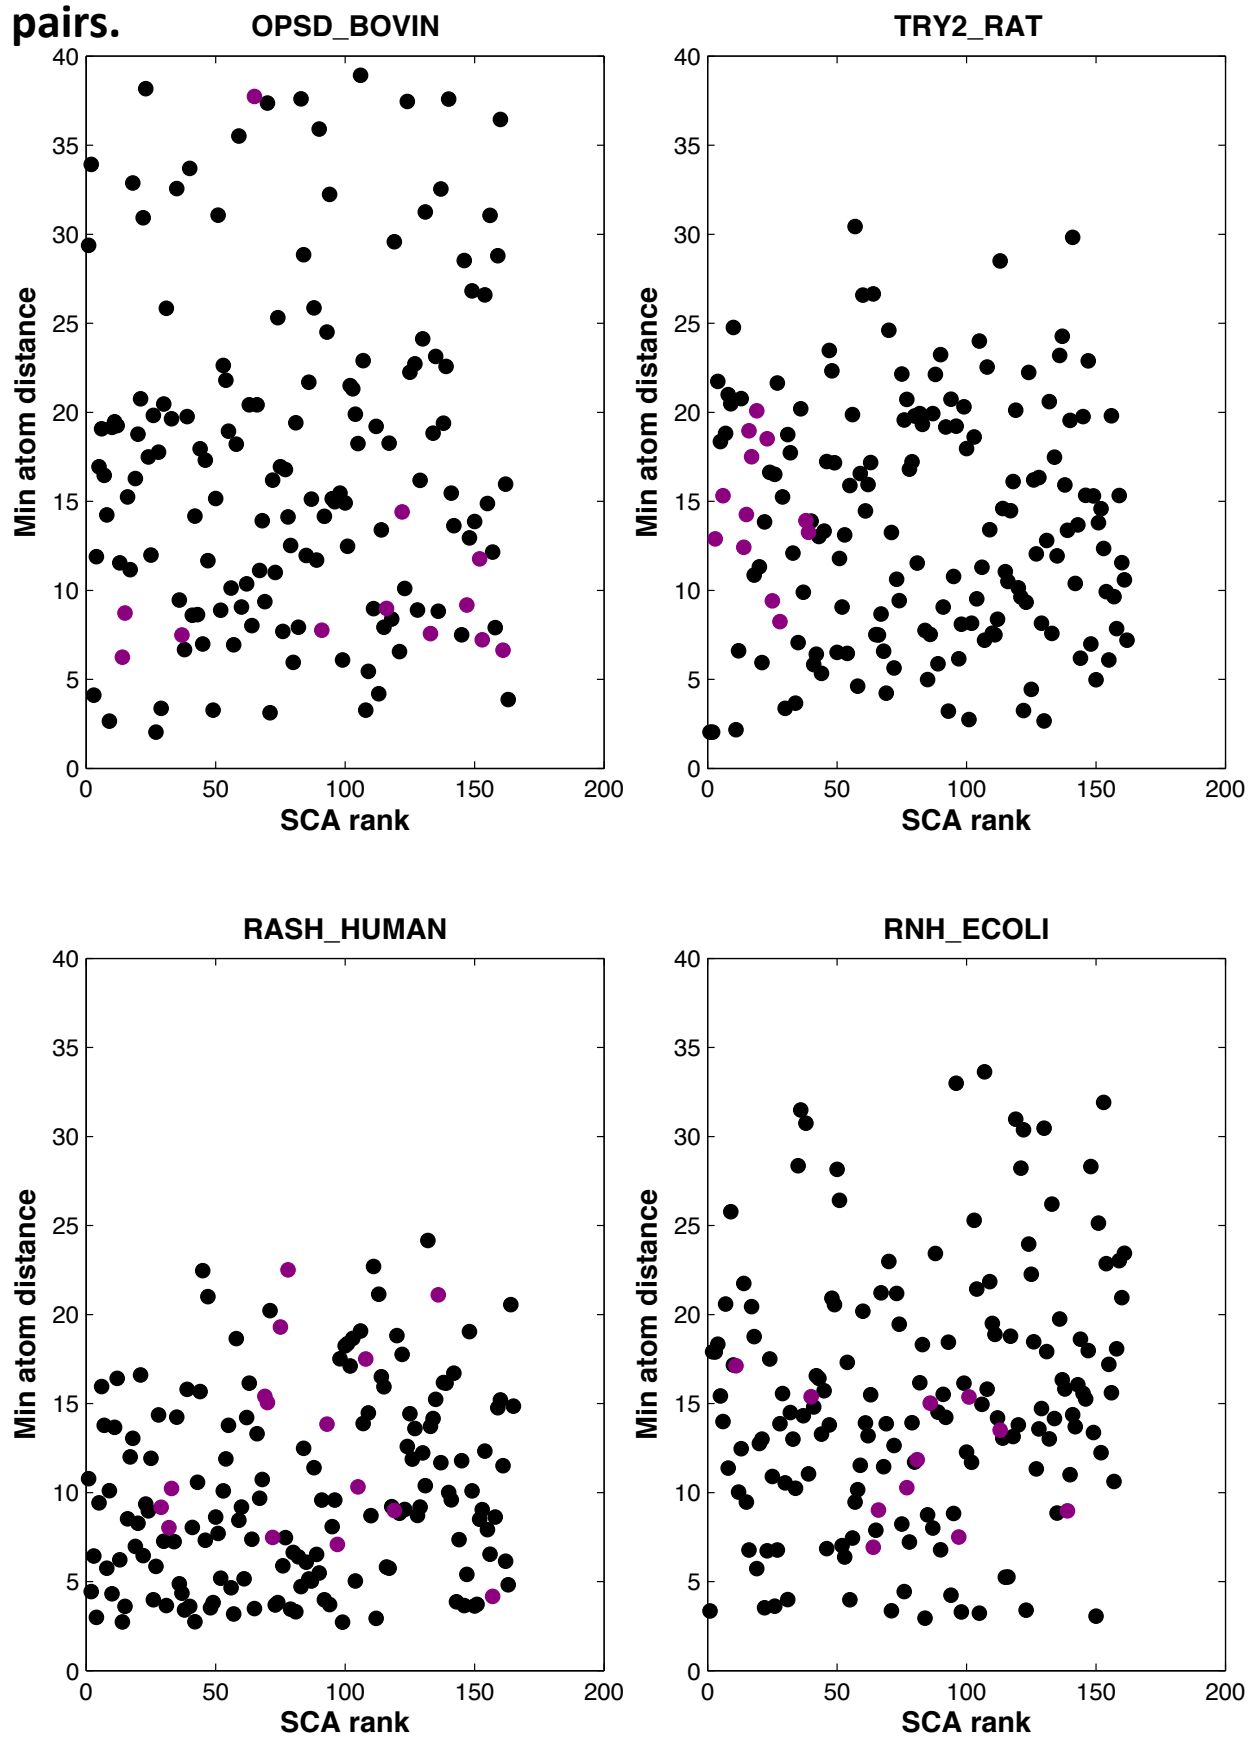

**Figure S15. The minimum atom distance of top 200 ranked SCA pairs.**

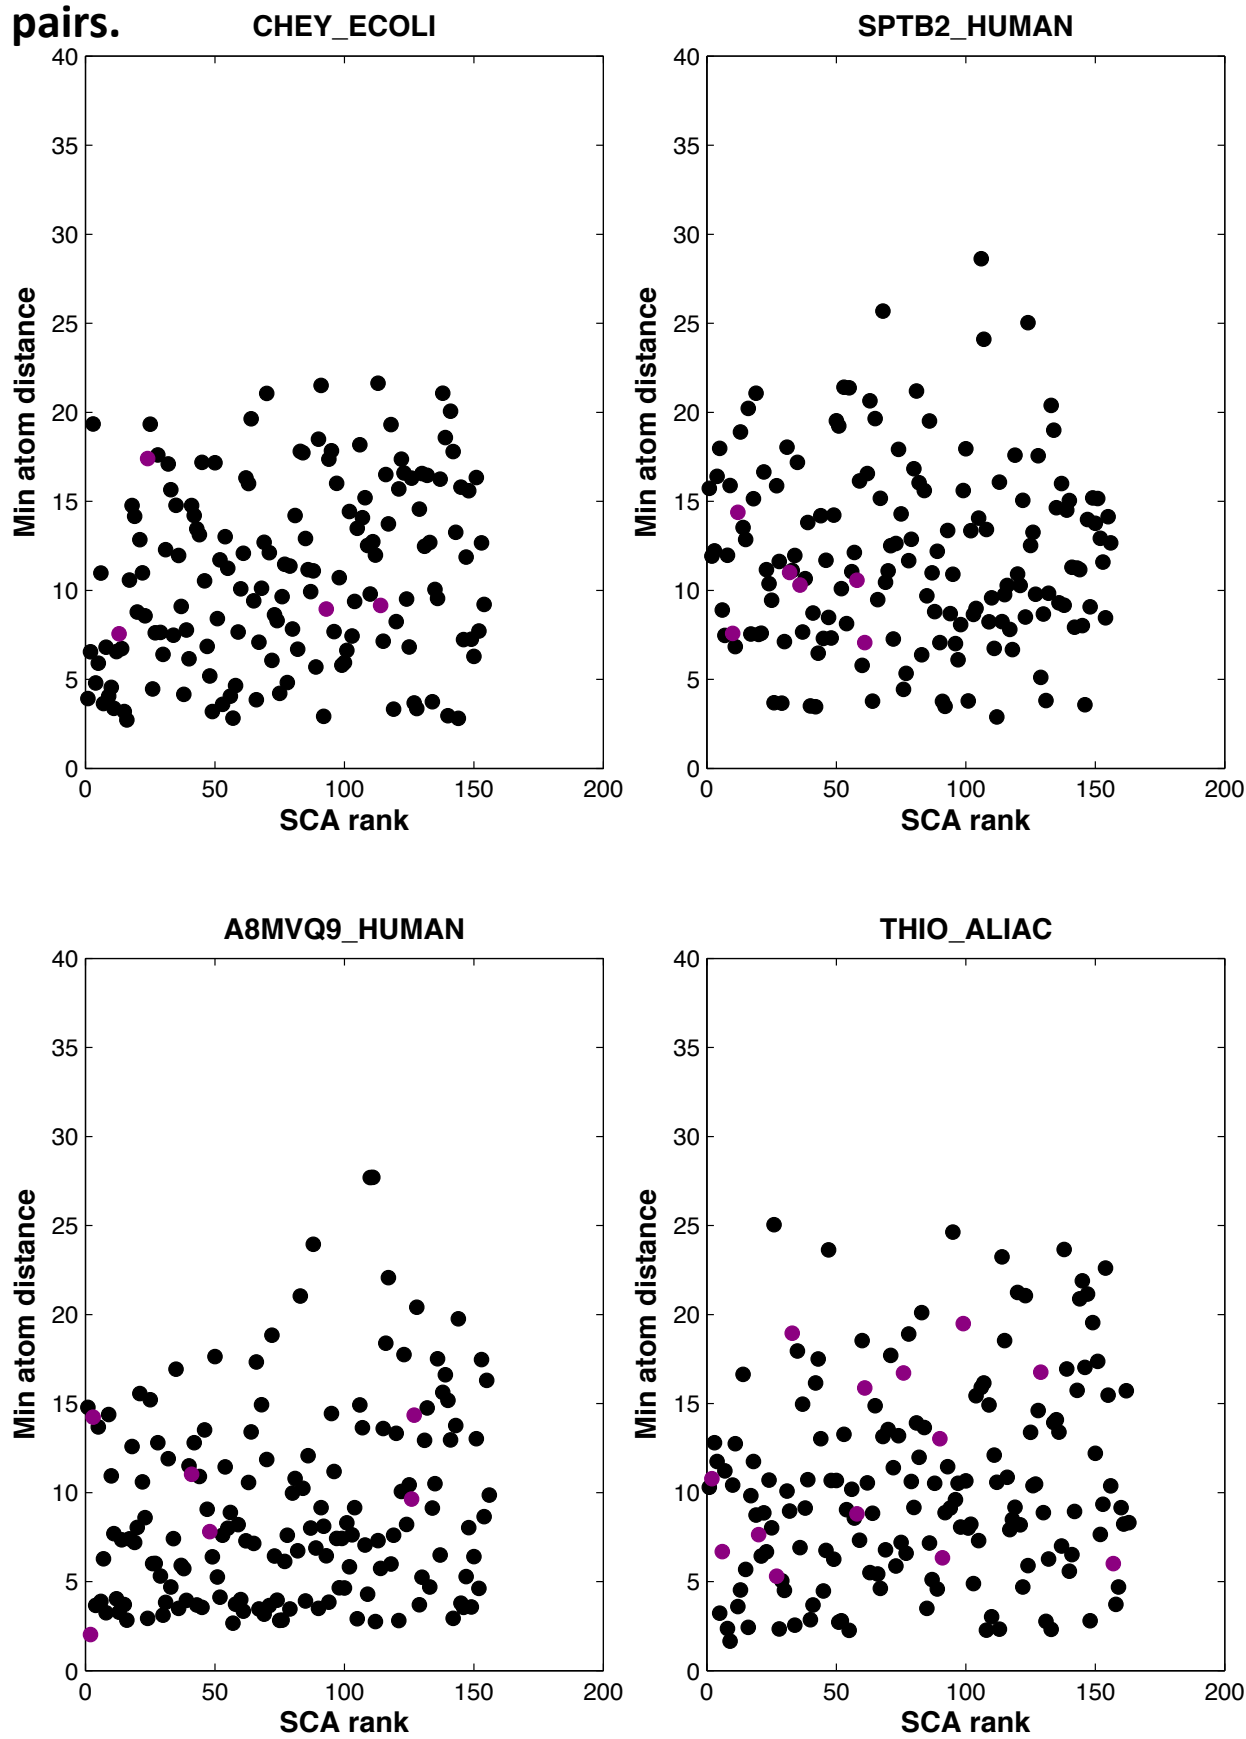

**Figure S15. The minimum atom distance of top 200 ranked SCA pairs.**

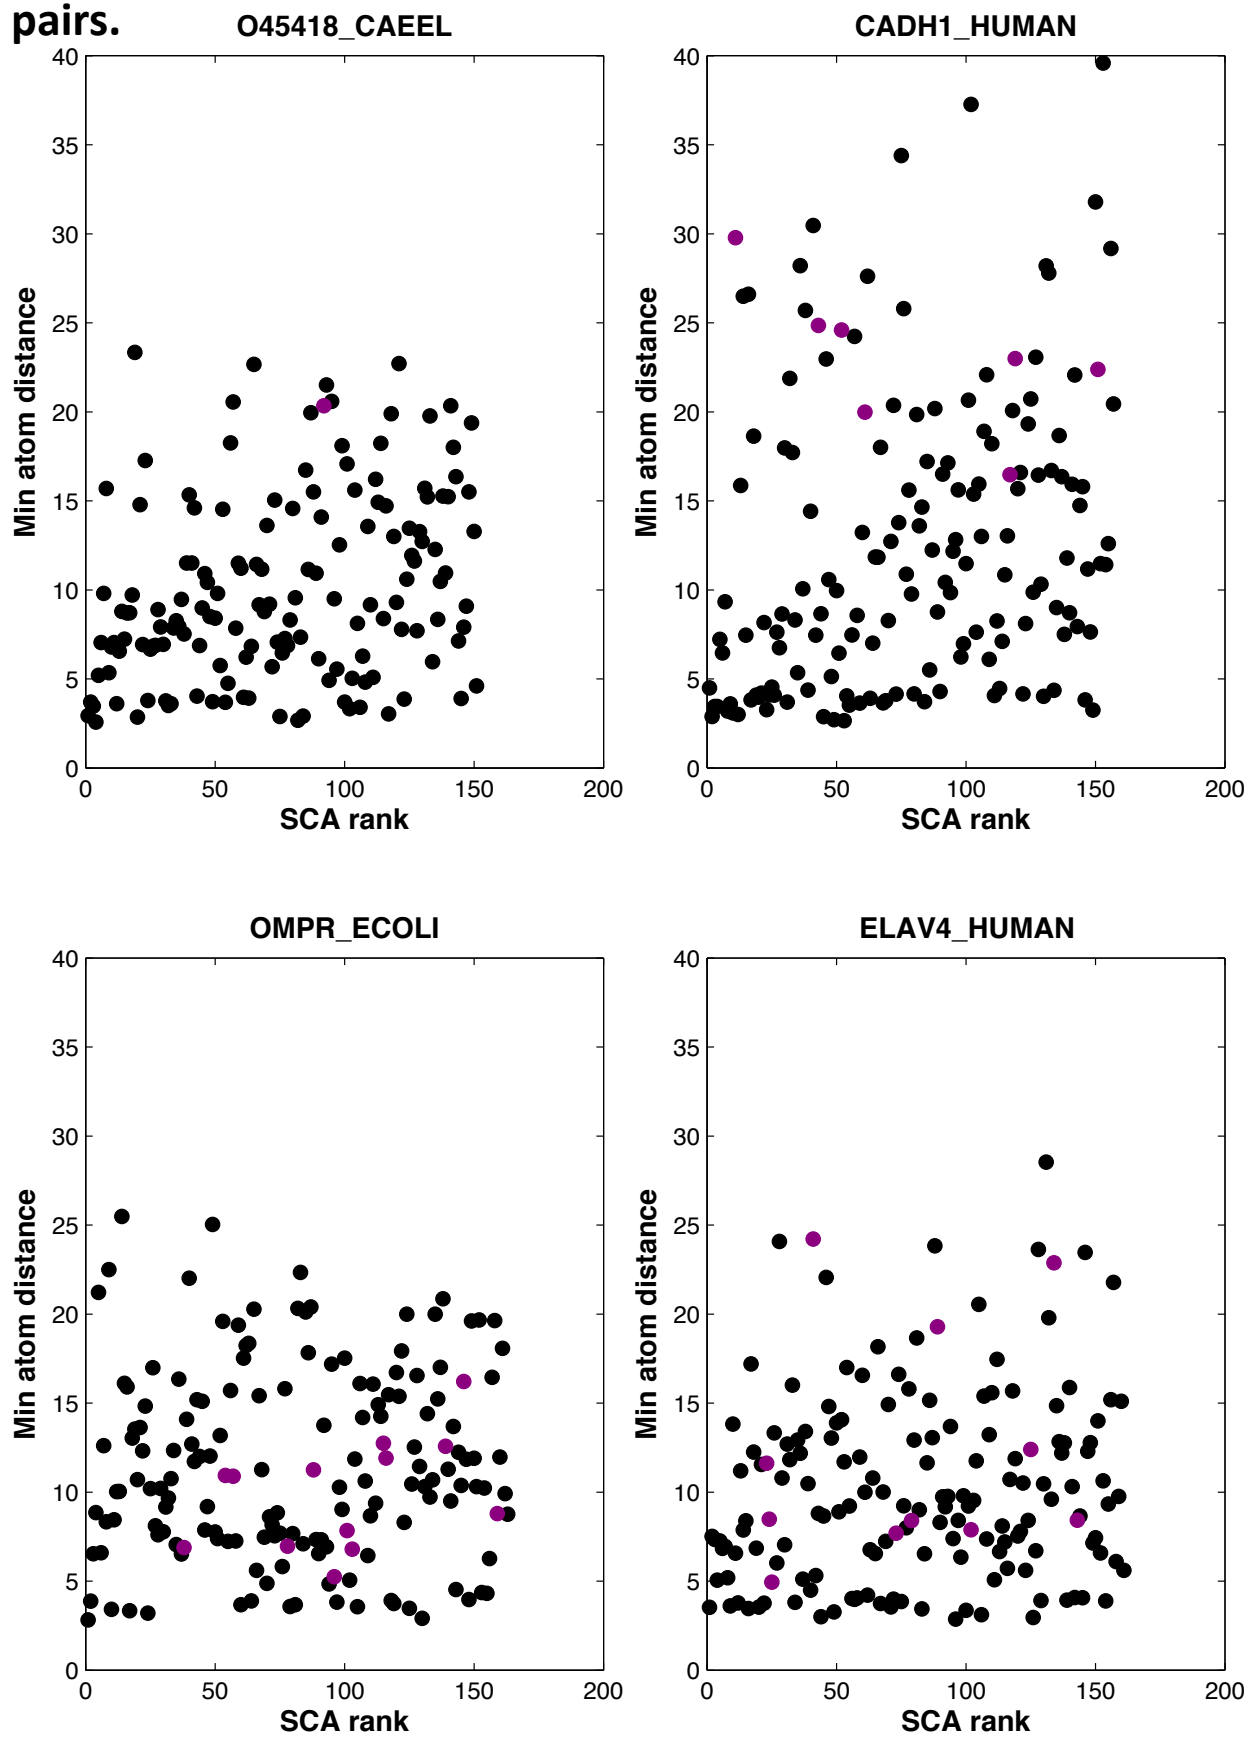

**Figure S15. The minimum atom distance of top 200 ranked SCA pairs.**

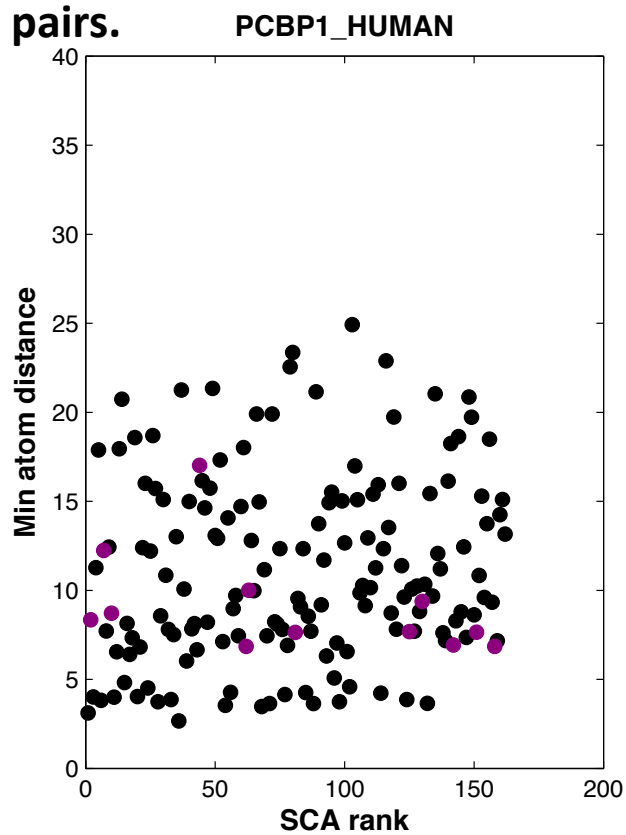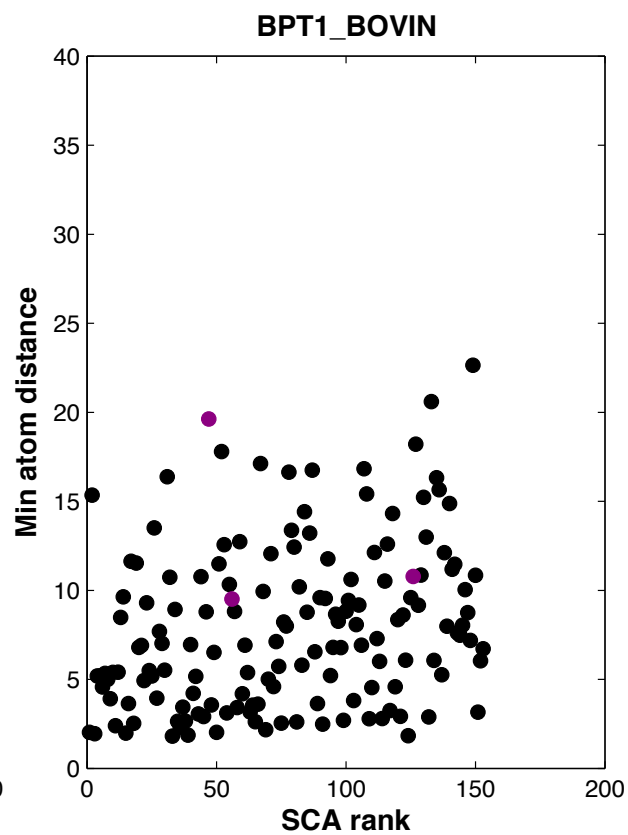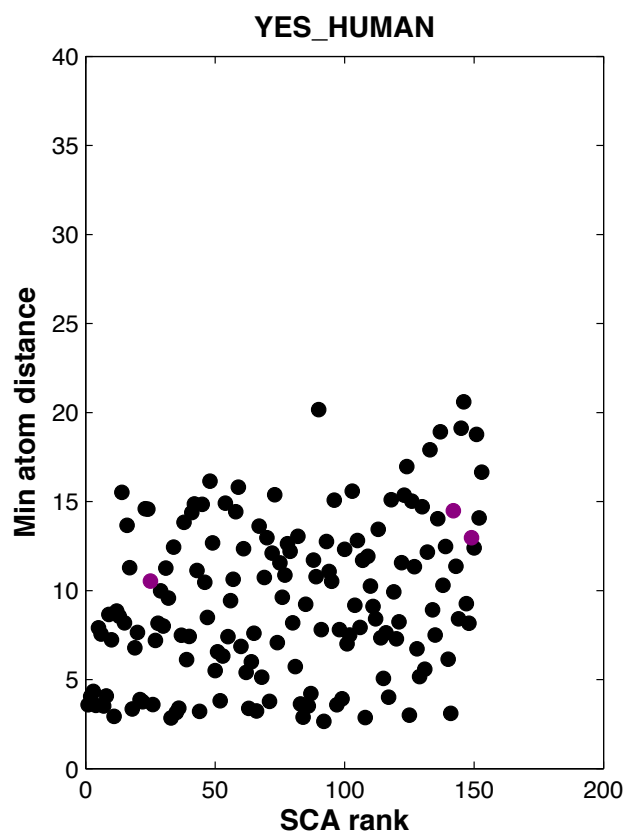

Supplement: pone.0028766.s015.pdf [file pone.0028766.s015.pdf]
