# Supplementary material for: Protein 3D Structure Computed from Evolutionary Sequence Variation
Source: PubMed Central journal article supplement (PMC3233603; doi:10.1371/journal.pone.0028766), 2011-12-07

**Figure S16. Number of distance constraints required for best 3D structure prediction.**

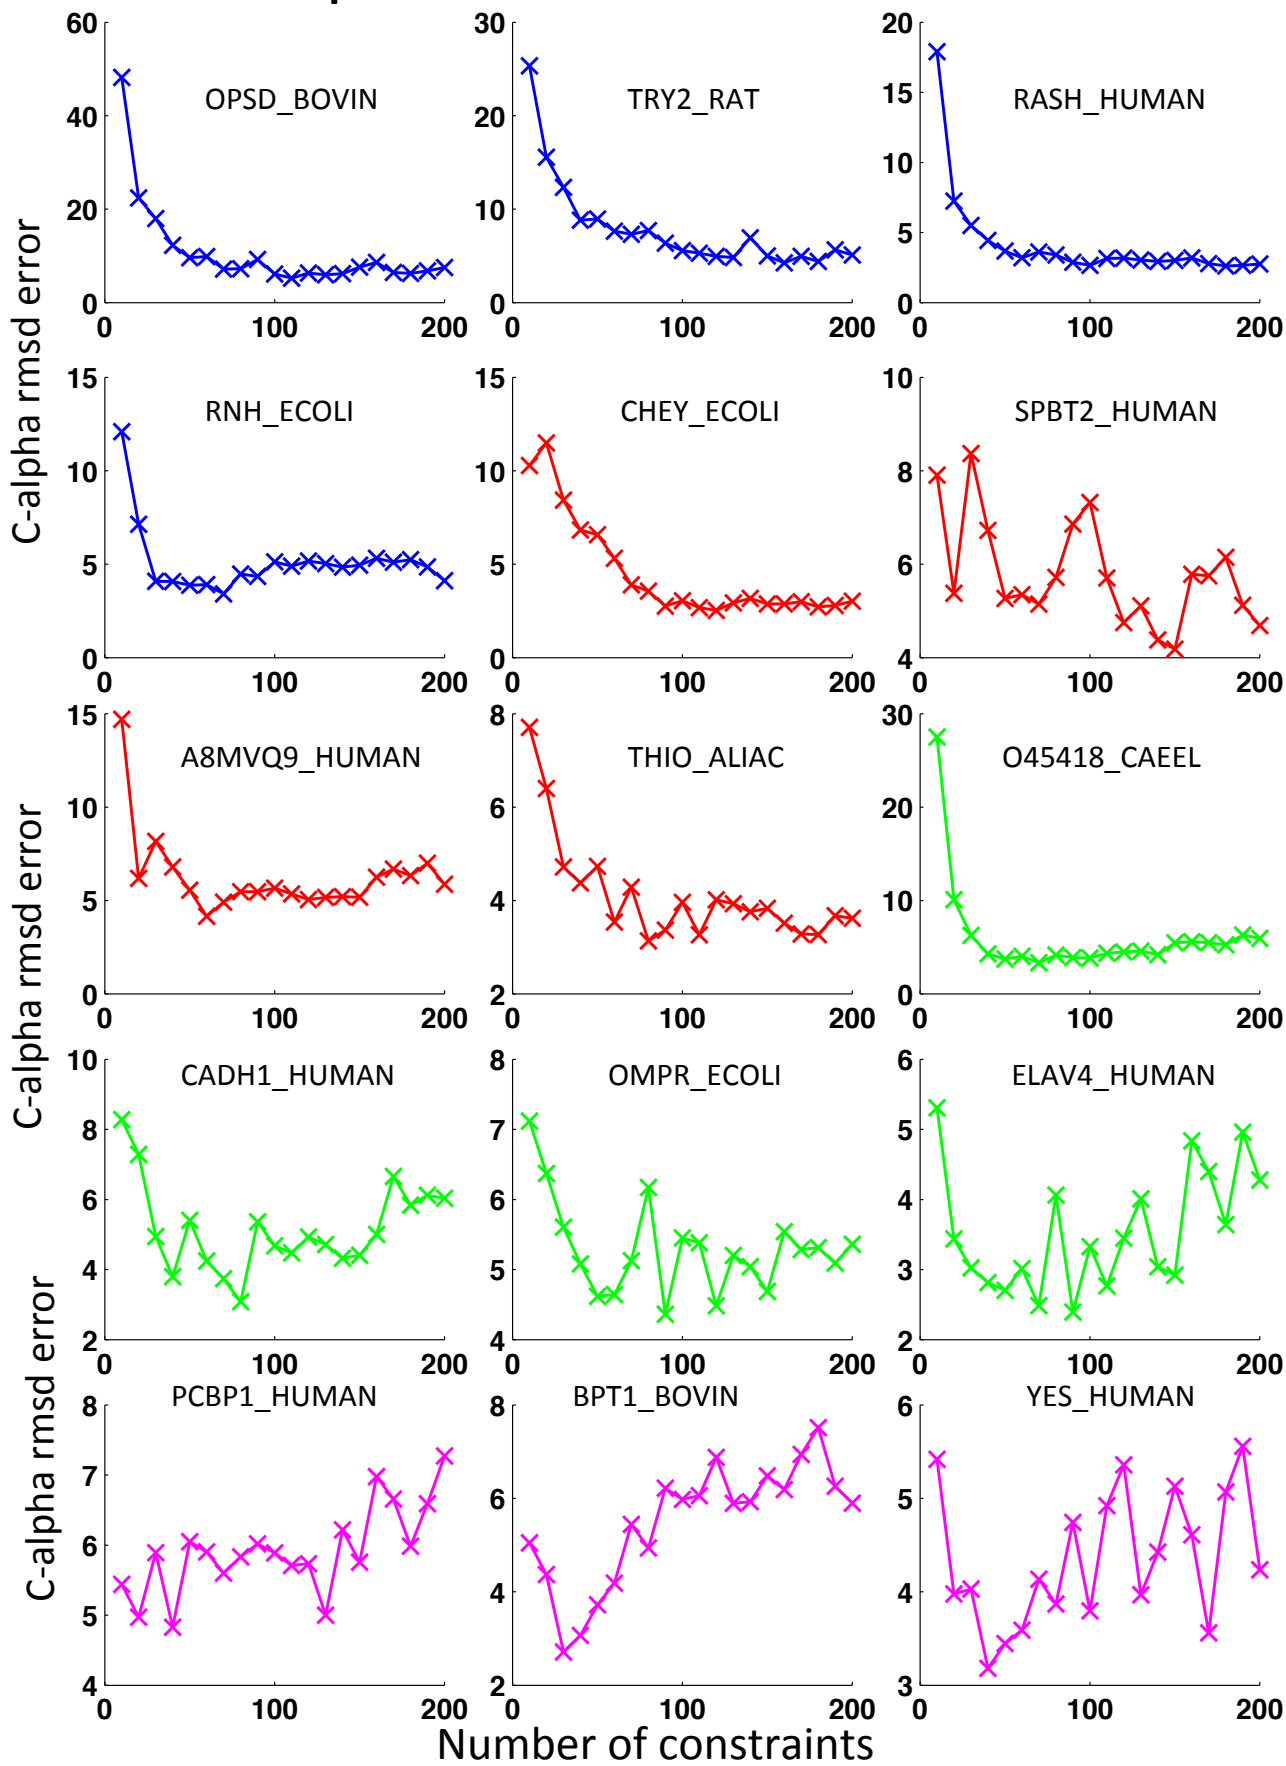

Supplement: pone.0028766.s016.pdf [file pone.0028766.s016.pdf]
