# Supplementary material for: Protein 3D Structure Computed from Evolutionary Sequence Variation
Source: PLoS One. 2011 Dec 7;6(12):e28766. doi: 10.1371/journal.pone.0028766 (PMC3233603; doi:10.1371/journal.pone.0028766)
Supplement: Table S1 — Protein 3D structure computed from evolutionary sequence variation. (XLS) [file pone.0028766.s018.xls]

## Sheet: Sheet1
			Table S1 : Protein 3D structure computed from evolutionary sequence variation Debora S. Marks *, Lucy J. Colwell, *, Robert Sheridan, Thomas A. Hopf, Andrea Pagnani, Riccardo Zecchina, Chris Sander
uniprot id	uniprot name	pfam number	pfam name	fold type	length	Top ranked maxcluster rmsd	Top ranked structure number	TM of top ranked structure	GDT_TS of top ranked structure	C-alpha RMSD for lowest TM score	highest TM score structure number	highest TM score	lowest TM score GDT_TS	TP rate for 50 constraints	Lowest number of constraints to get below 5 angstrom RMSD in pymol	Lowest number of constraints per residue to get below 5 angstrom RMSD in pymol	number of sequences in PFAM family	effective number of sequences used	pdb ID
P01112	RASH_HUMAN	PF00071	Ras	a/b	161	3.5 (161)	130_17	0.7	49.6	2.8 (155)	100_8	0.76	57	0.8	40	0.248447	10360	2226	5p21
P0AE67	CHEY_ECOLI	PF00072	Response_reg	a/b	114	2.98 (107)	110_1	0.65	49.6	2.96 (107)	160_19	0.67	49.2	0.67	60	0.526316	72000	23936	1e6k
P80579	THIO_ALIAC	PF00085	Thioredoxin	a/b	103	3.86 (94)	80_8	0.55	45.5	3.5 (97)	80_4	0.59	52	0.68	40	0.38835	12566	3875	1rqm
P0A7Y4	RNH_ECOLI	PF00075	RNase_H	a/b	141	4.0 (110)	70_16	0.54	35	3.5 (114)	70_19	0.57	42	0.68	30	0.212766	10835	1032	1f21
P00763	TRY2_RAT	PF00089	Trypsin	b	223	4.53 ( 183)	160_20	0.6	35.8	4.27 (186)	160_20	0.54	35	0.81	130	0.58296	15727	5018	3tgi
P12830	CADH1_HUMAN	PF00028	Cadherin	b	100	3.8 (88)	70_4	0.55	45.8	3.86 (96)	70_15	0.57	51.2	0.86	30	0.3	12380	3461	2o72
P07947	YES_HUMAN	PF00018	SH3_1	b	48	3.6 (47)	40_20	0.37	50	3.35 ( 43)	60_20	0.41	51.6	0.52	20	0.416667	6285	1180	2hda
O45418	O45418_CAEEL	PF00254	FKBP_C	a+b	100	4.1 (88)	50_9	0.48	40.8	3.4 (79)	70_19	0.53	45.5	0.77	40	0.4	7519	1553	1r9h
P26378	ELAV4_HUMAN	PF00076	RRM_1	a+b	71	2.9 (67)	40_12	0.57	54.6	3.16 (71)	40_19	0.59	58.5	0.71	20	0.28169	27555	6423	1g2e
Q9NNX6	A8MVQ9_HUMAN	PF00059	Lectin_C	a+b	107	4.8 (85)	110_20	0.39	30.6	4.0 (100)	60_12	0.53	44.4	0.8	60	0.560748	4836	2002	2it6
Q15365	PCBP1_HUMAN	PF00013	KH_1	a+b	63	4.69 (46)	40_15	0.25	27.8	4.61 (61)	20_12	0.35	37.7	0.47	20	0.31746	9237	1515	1wvn
P02699	OPSD_BOVIN	PF00001	7tm_1	transmembrane	258	4.84 (171)	180_20	0.5	25.4	4.29 (180)	110_18	0.55	32.2	0.38	110	0.426357	27023	4502	1hzx
P00974	BPT1_BOVIN	PF00014	Kunitz_BPTI	a and b ( small)	52	2.73 (53)	30_5	0.49	46	2.75 (53)	30_5	0.49	46	0.71	20	0.384615	2251	874	5pti
P0AA16	OMPR_ECOLI	PF00486	Trans_reg_C	a	77	4.7 (64)	40_18	0.35	34.1	3.9 (62)	50_15	0.45	44.8	0.38	50	0.649351	24439	4795	1odd
Q01082	SPTB2_HUMAN	PF00307	CH (calponin homology)	a	108	4.0 (47)	60_20	0.37	22.4	3.88 (88)	150_12	0.5	41	0.5	120	1.11111	4114	829	1bkr
			-
