# Supplementary material for: Protein 3D Structure Computed from Evolutionary Sequence Variation
Source: PLoS One. 2011 Dec 7;6(12):e28766. doi: 10.1371/journal.pone.0028766 (PMC3233603; doi:10.1371/journal.pone.0028766)
Supplement: Table S3 — Distance ranges used for predicted secondary structural elements in folding calculations. (DOC) [file pone.0028766.s020.doc]

**Table S3. Distance ranges used for predicted secondary structural elements in folding calculations**

| ***Residue 1*** | ***Residue 2*** | ***O - O***  ***Distance***  ***Bound*** | ***N-N***  ***Distance***  ***Bound*** | ***O-N***  ***Distance***  ***Bound*** | ***CA-CA***  ***Distance***  ***Bound*** | ***CA-O***  ***Distance***  ***Bound*** | ***CB-CB***  ***Distance***  ***Bound*** |
| --- | --- | --- | --- | --- | --- | --- | --- |
| H | H+1 | 3.07  0.2 | 2.82  0.2 |  | 3.82  0.2 | 4.45  0.2 | 3.6  0.4 |
| H | H+2 | 4.65  0.4 | 4.4  0.4 | 3.3  0.3 | 5.5  0.3 | 5.6  0.4 | 5.15  0.4 |
| H | H+3 | 5.05  0.65 | 5.0  0.6 | 3.95  0.5 | 5.3  0.65 | 5.9  0.8 | 5.2  0.8 |
| H | H+4 | 6.3  0.65 | 6.25  0.8 | 4.3  0.7 | 6.35  0.7 | 7.5  0.7 | 6.35  0.8 |
| H | H+5 | 8.3  0.55 | 8.2  0.5 | 6.1  0.6 | 8.7  0.6 | 9.55  0.6 | 8.55  0.65 |
| H | H+6 | 9.7  0.6 | 9.6  0.55 | 7.95  0.6 | 10.05  0.6 | 10.65  0.65 | 9.9  0.75 |
| H | H+7 | 10.75  0.75 | 10.75  0.65 | 9.05  0.7 | 10.8  0.75 | 11.7  0.75 | 10.8  1.0 |
| H | H+8 | 12.3  0.8 | 12.3  0.7 | 10.3  0.75 | 12.45  0.8 | 13.5  0.75 | 12.45  1.0 |
| E | E+1 | 3.4  0.3 | 3.4  0.3 |  |  | 4.6  0.2 | 4.4  0.5 |
| E | E+2 | 6.45  0.6 | 6.45  0.6 | 4.2  0.5 | 6.6  0.5 | 6.6  0.5 | 7.6  0.7 |
| E | E+3 | 9.5  1.2 | 9.5  1.2 | 7.3  0.8 | 9.7  1.2 | 10.6  1.3 | 9.9  1.3 |
| E | E+4 | 12.5  1.6 | 12.5  1.6 | 10.3  1.3 | 12.6  1.6 | 13.6  1.7 | 12.7  1.7 |
| E | E+5 | 15.4  2.2 | 15.4  2.2 | 13.3  1.9 | 15.5  2.3 | 16.4  2.3 | 15.6  2.3 |
| E | E+6 | 18.0  3.0 | 18.0  3.0 | 16.0  2.6 | 18.1  3.0 | 19.0  3.2 | 18.2  3.1 |
| E | E+7 | 20.5  4.0 | 20.5  4.0 | 18.6  3.6 | 20.5  4.1 | 21.3  4.2 | 20.6  4.1 |
